# Supplementary material for: Reactivity of azido terpyridine Pd(ii) and Pt(ii) complexes towards 4,4,4-trifluoro-2-butynoic acid: structural insight into the triazolato coordination mode
Source: Royal Society of Chemistry journal article supplement (doi:10.1039/d3ra06656h), 2023-01-01
Supplement: d3ra06656h1.pdf [file d3ra06656h1.pdf]

## Reactivity of azido terpyridine Pd(II) and Pt(II) complexes towards 4,4,4-trifluoro-2-butyric acid: Structural insight into the triazolato coordination mode

Ahmed M. Mansour,<sup>\*a</sup> Krzysztof Radacki,<sup>b</sup> Gamal A. E. Mostafa,<sup>c</sup> Essam A. Ali,<sup>c</sup> and Ola R. Shehab<sup>\*d</sup>

---

<sup>a.</sup> *Department of Chemistry, United Arab Emirates University, Al-Ain, United Arab Emirates.*

[Mansour\\_am@uaeu.ac.ae](mailto:Mansour_am@uaeu.ac.ae); [inorganic\\_am@yahoo.com](mailto:inorganic_am@yahoo.com)

<sup>b.</sup> *Institut für Anorganische Chemie, Julius-Maximilians-Universität Würzburg, Am Hubland, D-97074 Würzburg, Germany.*

<sup>c.</sup> *Department of Pharmaceutical Chemistry, College of Pharmacy, King Saud University, Riyadh 11451, Saudi Arabia.*

<sup>d.</sup> *Department of Chemistry, Faculty of Science, Cairo University, Gamma Street, Giza, Cairo 12613, Egypt. [Olashehab@sci.cu.edu.eg](mailto:Olashehab@sci.cu.edu.eg); [OlaShehab\\_chem@yahoo.com](mailto:OlaShehab_chem@yahoo.com)*

### Supporting information

## Supporting information

|                 |                                                                                                                                                                                        |     |
|-----------------|----------------------------------------------------------------------------------------------------------------------------------------------------------------------------------------|-----|
| <b>Fig. S1</b>  | ATR IR spectrum of the free terpyridine ligand.                                                                                                                                        | S3  |
| <b>Fig. S2</b>  | ATR IR spectrum of <b>1</b> .                                                                                                                                                          | S4  |
| <b>Fig. S3</b>  | ATR IR spectrum of <b>2</b> .                                                                                                                                                          | S5  |
| <b>Fig. S4</b>  | Solid-state $^{13}\text{C}$ NMR spectrum of <b>1</b> .                                                                                                                                 | S6  |
| <b>Fig. S5</b>  | Solid-state $^{15}\text{N}$ NMR spectrum of <b>1</b> .                                                                                                                                 | S7  |
| <b>Fig. S6</b>  | Solid-state $^{19}\text{F}$ NMR spectrum of <b>1</b> .                                                                                                                                 | S8  |
| <b>Fig. S7</b>  | Solid-state $^{13}\text{C}$ NMR spectrum of <b>2</b> .                                                                                                                                 | S9  |
| <b>Fig. S8</b>  | Solid-state $^{15}\text{N}$ NMR spectrum of <b>2</b> .                                                                                                                                 | S10 |
| <b>Fig. S9</b>  | ASAP mass spectra: Experimental (Up) and theoretical (down) ISOTOPIC pattern for <b>1</b> of <b>a</b> ) $m/z = 968.9147$ and <b>b</b> ) $m/z = 683.0772$ .                             | S11 |
| <b>Fig. S10</b> | ASAP mass spectra: Experimental (Up) and theoretical (down) ISOTOPIC pattern for <b>2</b> .                                                                                            | S12 |
| <b>Fig. S11</b> | ATR IR spectrum of <b>3</b> .                                                                                                                                                          | S13 |
| <b>Fig. S12</b> | ATR IR spectrum of <b>4</b> .                                                                                                                                                          | S14 |
| <b>Fig. S13</b> | Solid-state $^{13}\text{C}$ NMR spectrum of <b>3</b> .                                                                                                                                 | S15 |
| <b>Fig. S14</b> | Solid-state $^{15}\text{N}$ NMR spectrum of <b>3</b> .                                                                                                                                 | S16 |
| <b>Fig. S15</b> | Solid-state $^{19}\text{F}$ NMR spectrum of <b>3</b> .                                                                                                                                 | S17 |
| <b>Fig. S16</b> | Solid-state $^{31}\text{P}$ NMR spectrum of <b>3</b> .                                                                                                                                 | S18 |
| <b>Fig. S17</b> | Solid-state $^{13}\text{C}$ NMR spectrum of <b>4</b> .                                                                                                                                 | S19 |
| <b>Fig. S18</b> | Solid-state $^{15}\text{N}$ NMR spectrum of <b>4</b> .                                                                                                                                 | S20 |
| <b>Fig. S19</b> | Solid-state $^{19}\text{F}$ NMR spectrum of <b>4</b> .                                                                                                                                 | S21 |
| <b>Fig. S20</b> | ASAP mass spectra: Experimental (Up) and theoretical (down) ISOTOPIC pattern for complex <b>3</b> of <b>a</b> ) $m/z = 975.9554$ and <b>b</b> ) $m/z = 688.1186$ .                     | S22 |
| <b>Fig. S21</b> | Electrospray ionization mass spectra: Experimental (Up) and theoretical (down) ISOTOPIC pattern for <b>4</b> .                                                                         | S23 |
| <b>Fig. S22</b> | ATR IR spectrum of <b>5</b> .                                                                                                                                                          | S24 |
| <b>Fig. S23</b> | ATR IR spectrum of <b>6</b> .                                                                                                                                                          | S25 |
| <b>Fig. S24</b> | Electrospray ionization mass spectra: Experimental (Up) and theoretical (down) ISOTOPIC pattern for complex <b>5</b> of <b>a</b> ) $m/z = 854.1431$ and <b>b</b> ) $m/z = 1315.0461$ . | S26 |
| <b>Fig. S25</b> | Electrospray ionization mass spectra: Experimental (Up) and theoretical (down) ISOTOPIC pattern for complex <b>6</b> .                                                                 | S27 |
| <b>Fig. S26</b> | $^1\text{H}$ NMR spectrum of <b>5</b> .                                                                                                                                                | S28 |
| <b>Fig. S27</b> | $^{13}\text{C}$ NMR spectrum of <b>5</b> .                                                                                                                                             | S29 |
| <b>Fig. S28</b> | $^{19}\text{F}$ NMR spectrum of <b>5</b> .                                                                                                                                             | S30 |
| <b>Fig. S29</b> | $^{31}\text{P}$ NMR spectrum of <b>5</b> .                                                                                                                                             | S31 |
| <b>Fig. S30</b> | HSQC $\{^1\text{H}, ^{13}\text{C}\}$ NMR spectrum of <b>5</b> .                                                                                                                        | S32 |
| <b>Table S1</b> | Corrected energies values of Pd(II) and Pt(II) triazolate bound isomers ( <b>5</b> and <b>6</b> ).                                                                                     | S33 |
| <b>Table S2</b> | calculated bond lengths of the Pd(II) triazolate isomers (N1, N2 and N3).                                                                                                              | S34 |
| <b>Table S3</b> | calculated bond lengths of the Pt(II) triazolate isomers (N1, N2 and N3).                                                                                                              | S37 |
| <b>Table S4</b> | The electronic configuration of the metal center (Pd or Pt) of the triazolate isomers (N1, N2 and N3), its 4d (or 5d) electronic distribution and the natural atomic charge            | S40 |
| <b>Fig. S31</b> | TDDFT spectrum of the triazolate isomers of <b>5</b> calculated at B3LYP/LANL2DZ level of theory using PCM solvation model.                                                            | S41 |

|                 |                                                                                                                                                                               |     |
|-----------------|-------------------------------------------------------------------------------------------------------------------------------------------------------------------------------|-----|
| <b>Fig. S32</b> | TDDFT spectrum of the triazolate isomers of <b>6</b> calculated at B3LYP/LANL2DZ level of theory using PCM solvation model.                                                   | S42 |
| <b>Table S5</b> | Computed excitation energies (eV), electronic transition configurations and oscillator strengths ( <i>f</i> ) of rhenium(I) compounds (selected, <i>f</i> > 0.001) (Selected) | S43 |

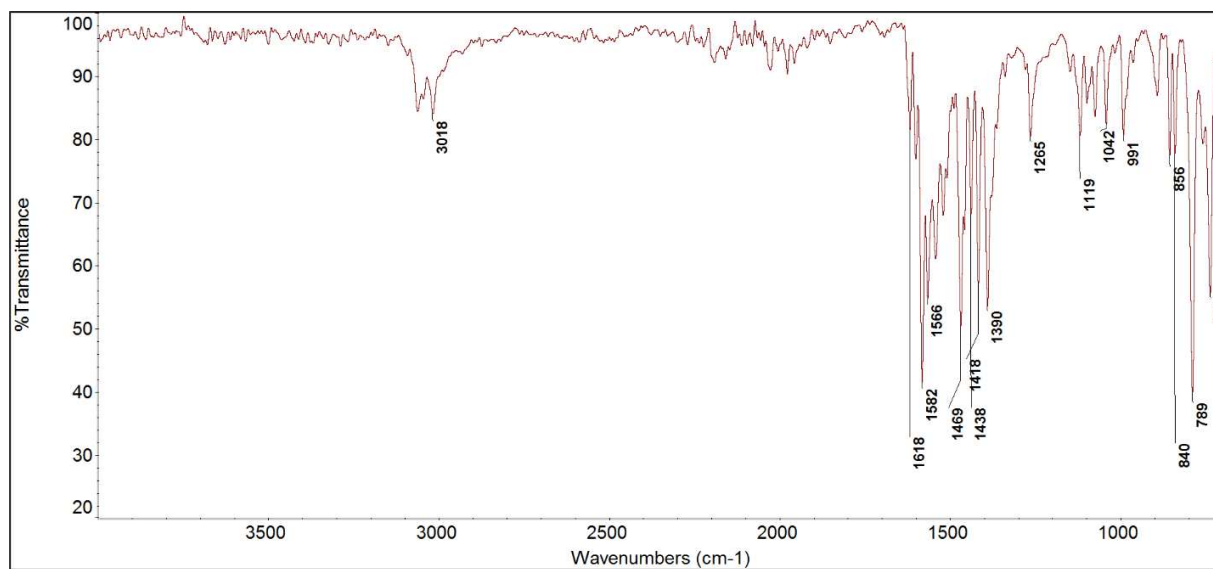

**Fig. S1** ATR IR spectrum of the free terpyridine ligand.

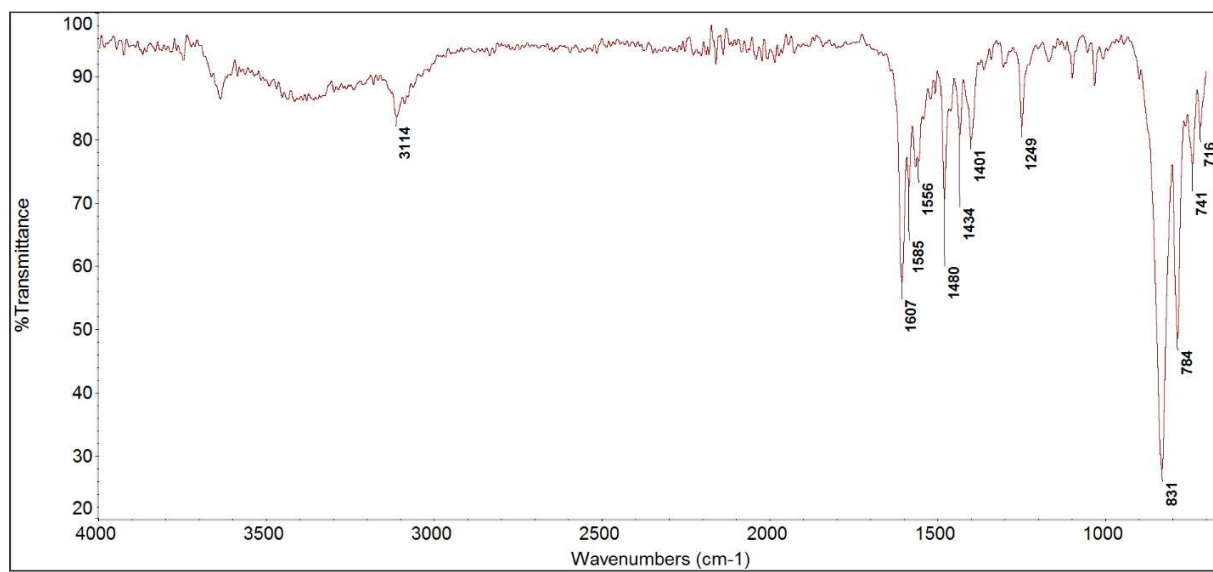

**Fig. S2** ATR IR spectrum of **1**.

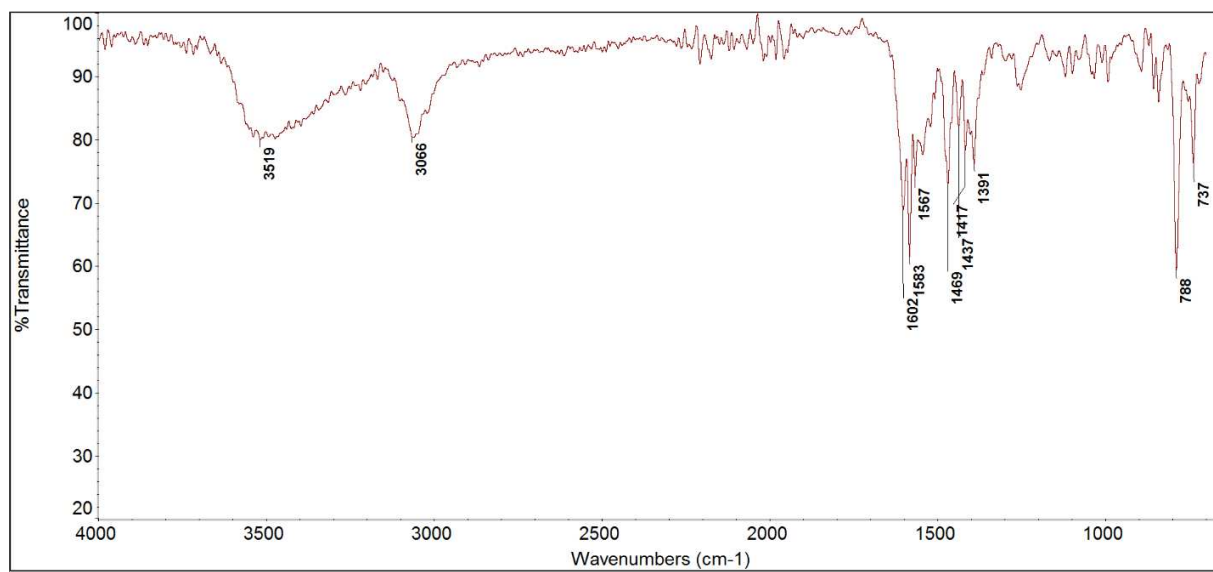

**Fig. S3** ATR IR spectrum of **2**.

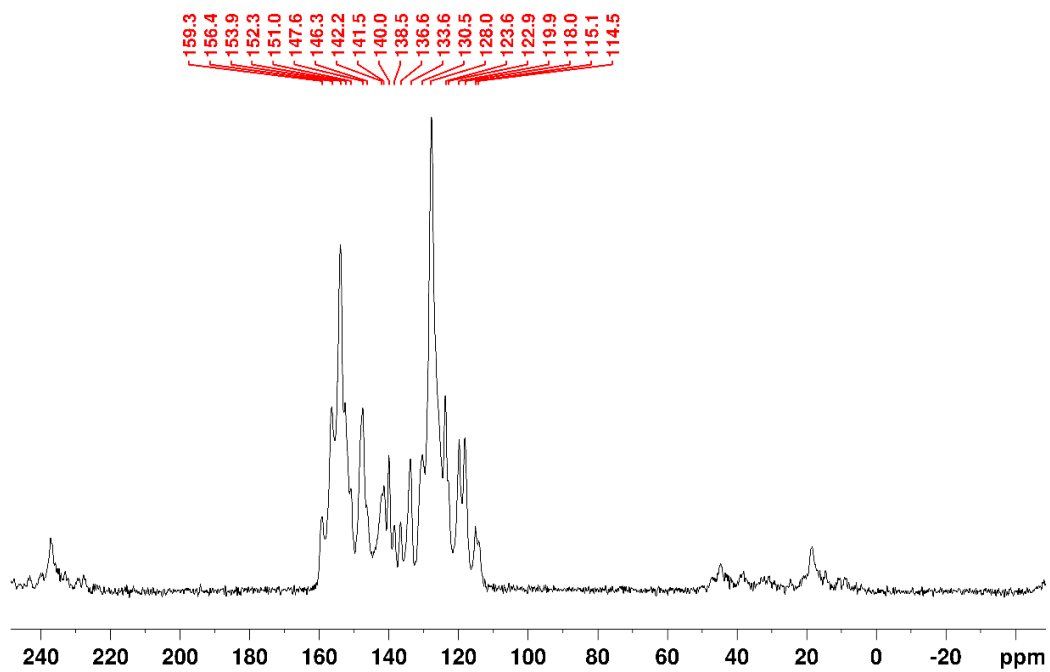

Fig. S4 Solid-state  $^{13}\text{C}$  NMR spectrum of **1**.

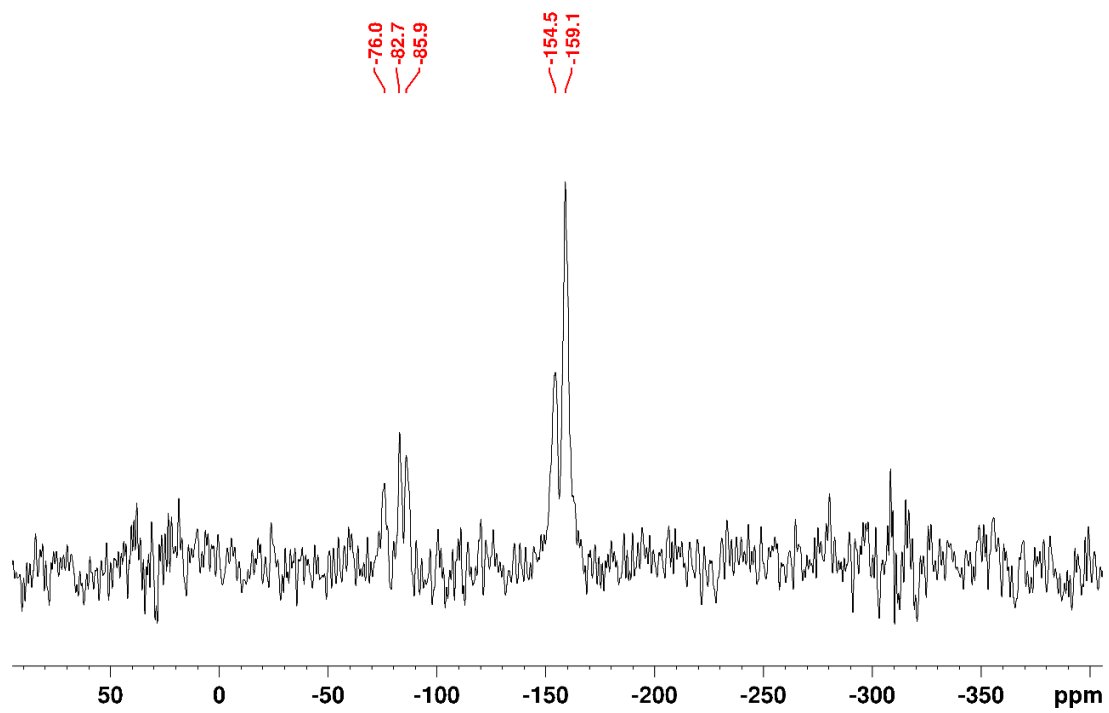

Fig. S5 Solid-state  $^{15}\text{N}$  NMR spectrum of **1**.

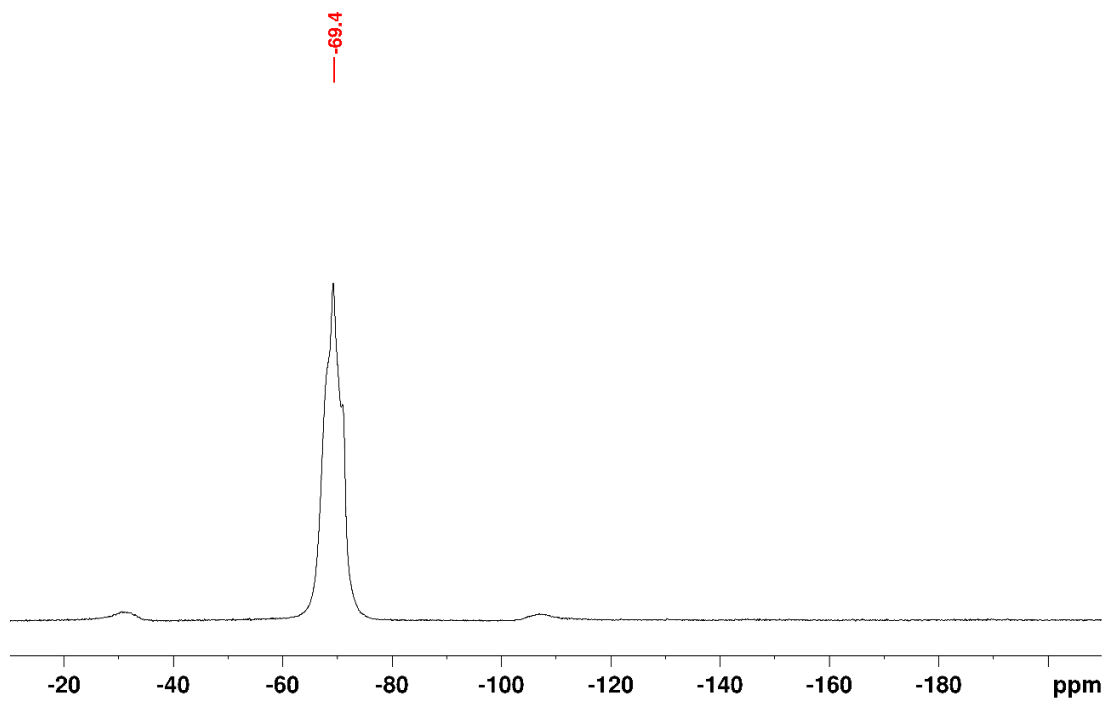

**Fig. S6** Solid-state  $^{19}\text{F}$  NMR spectrum of **1**.



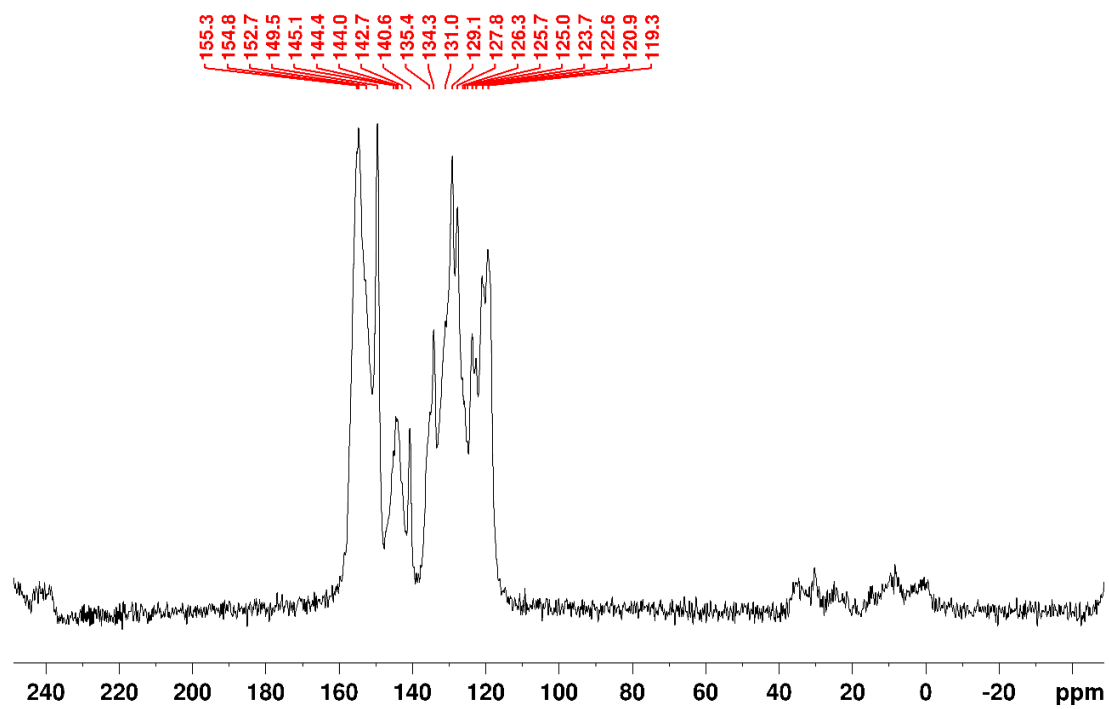

**Fig. S7** Solid-state  $^{13}\text{C}$  NMR spectrum of **2**.

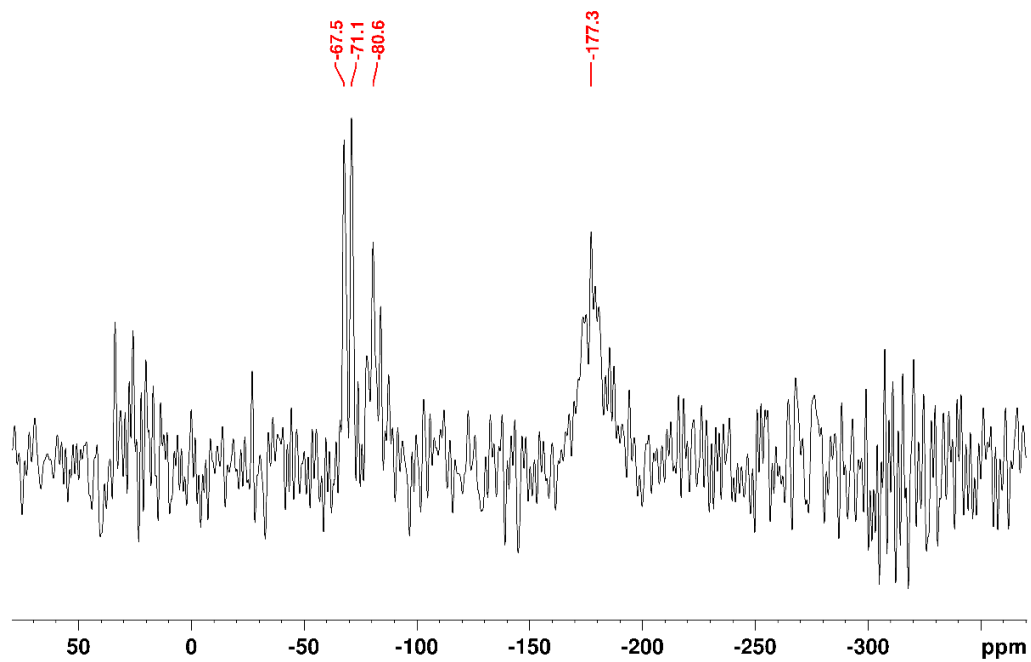

**Fig. S8** Solid-state  $^{15}\text{N}$  NMR spectrum of **2**.

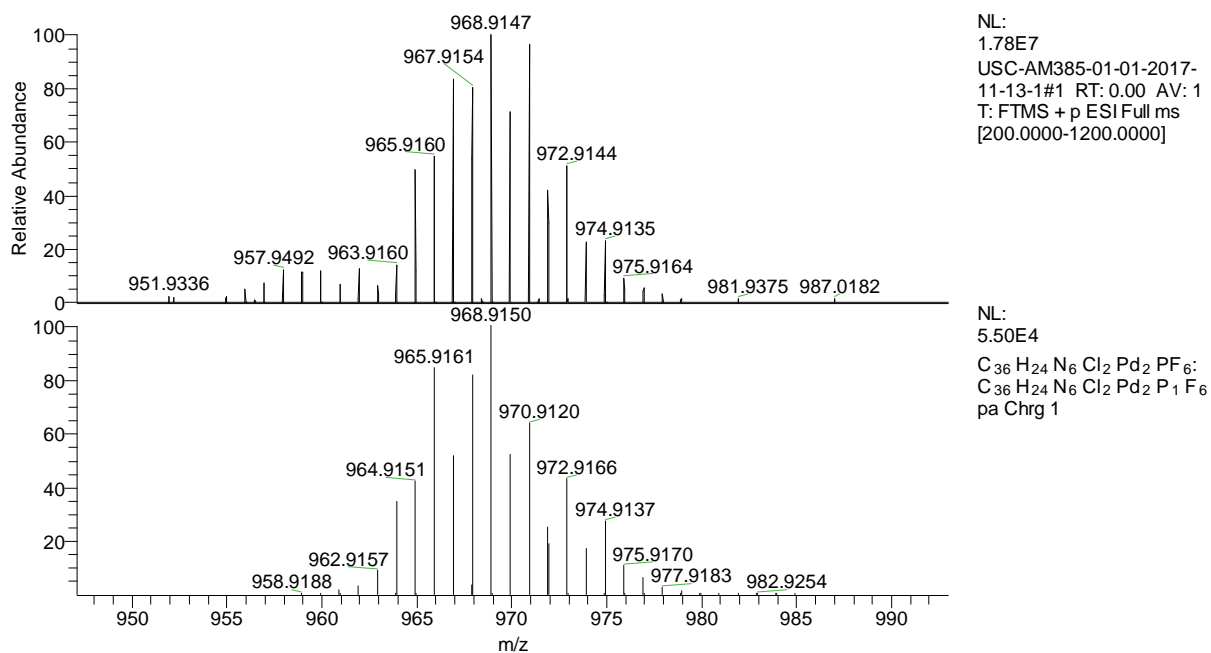

a)

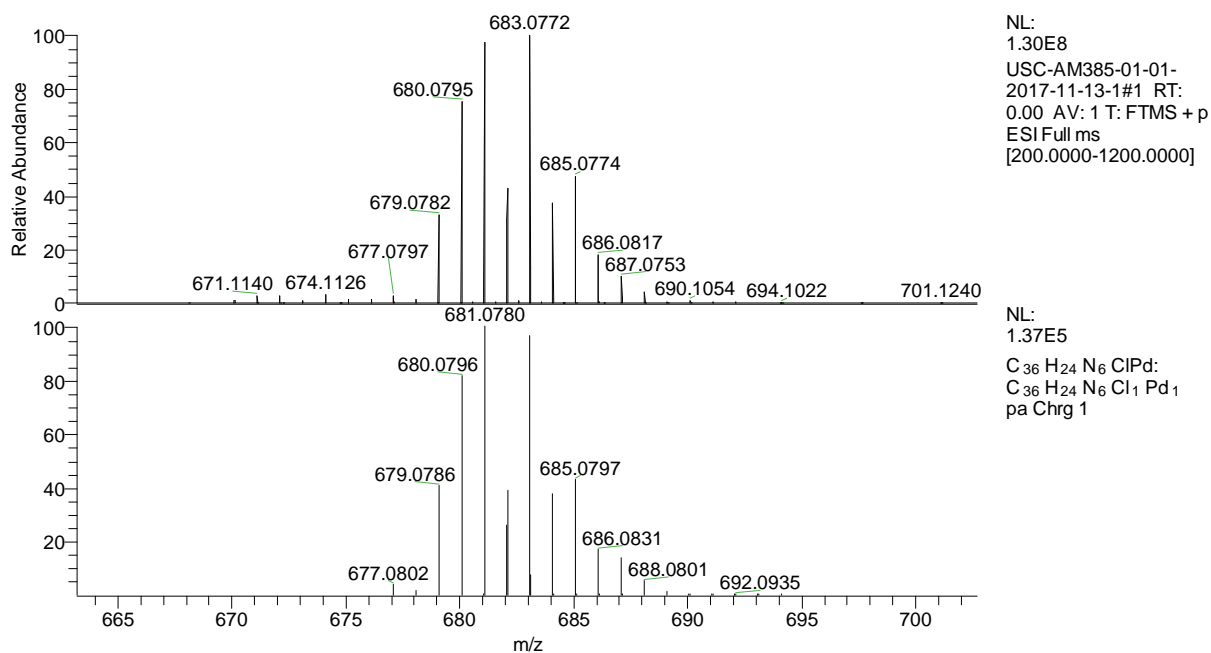

b)

Fig. S9 ASAP mass spectra: Experimental (Up) and theoretical (down) ISOTOPIC pattern for **1** of a)  $m/z = 968.9147$  and b)  $m/z = 683.0772$ .

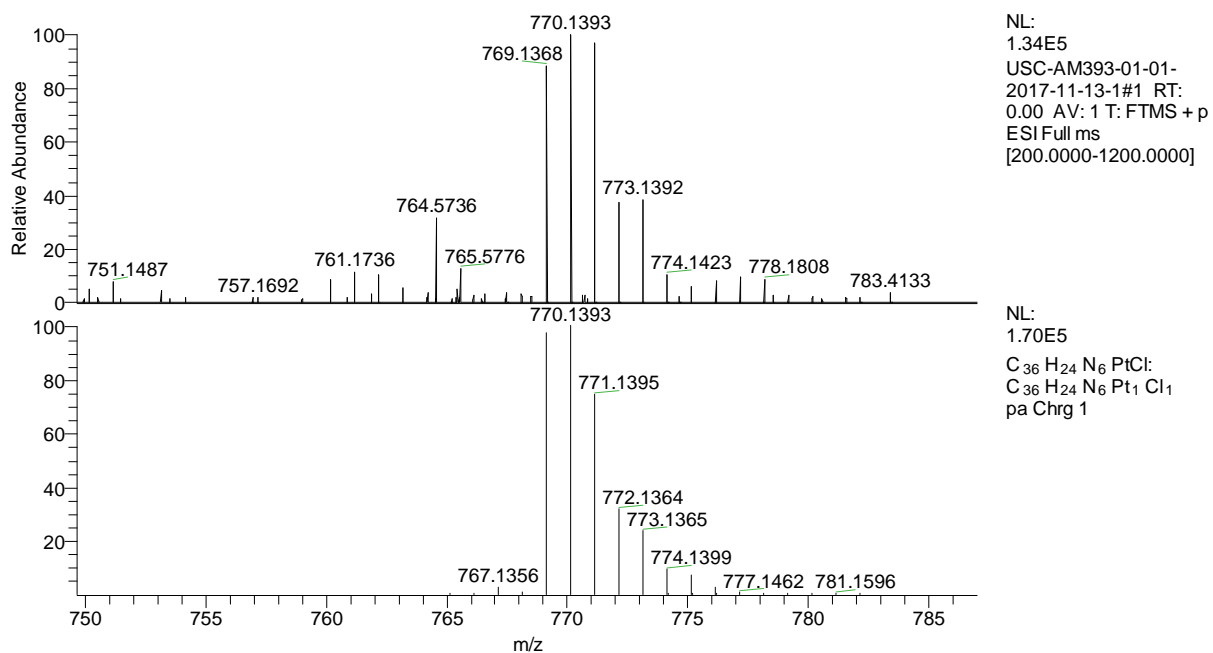

**Fig. S10** ASAP mass spectra: Experimental (Up) and theoretical (down) ISOTOPIC pattern for **2**.

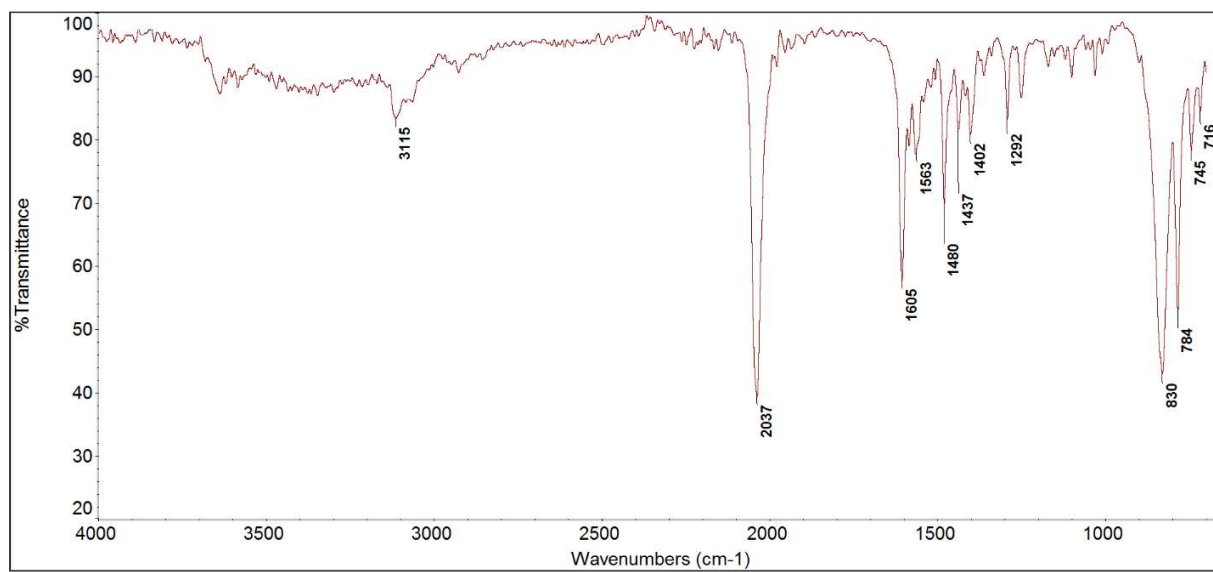

**Fig. S11** ATR IR spectrum of **3**.

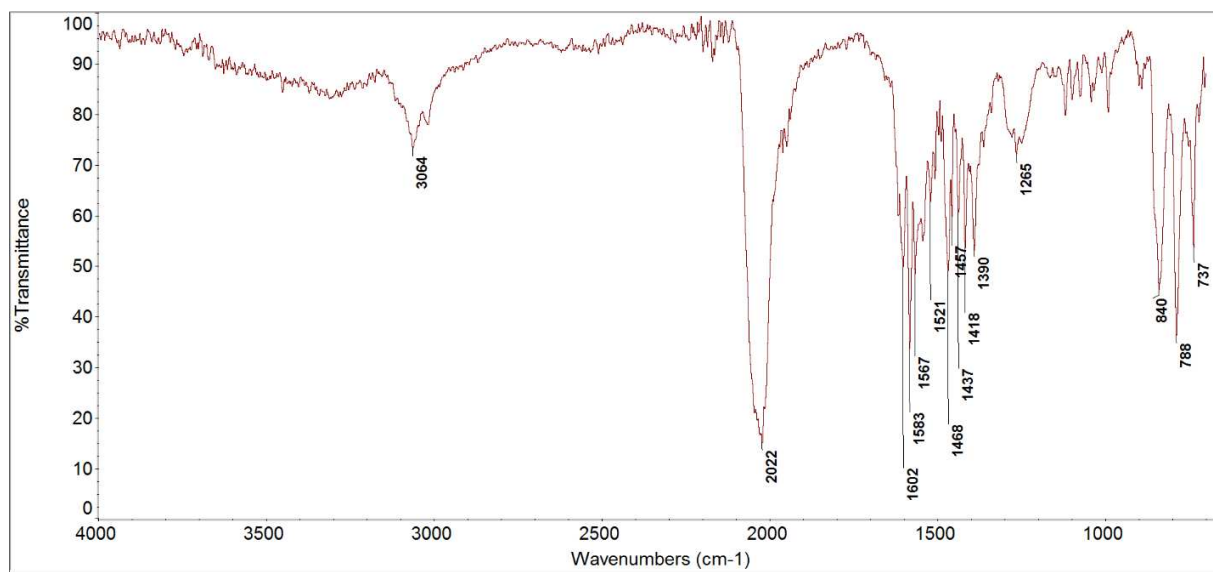

Fig. S12 ATR IR spectrum of 4.

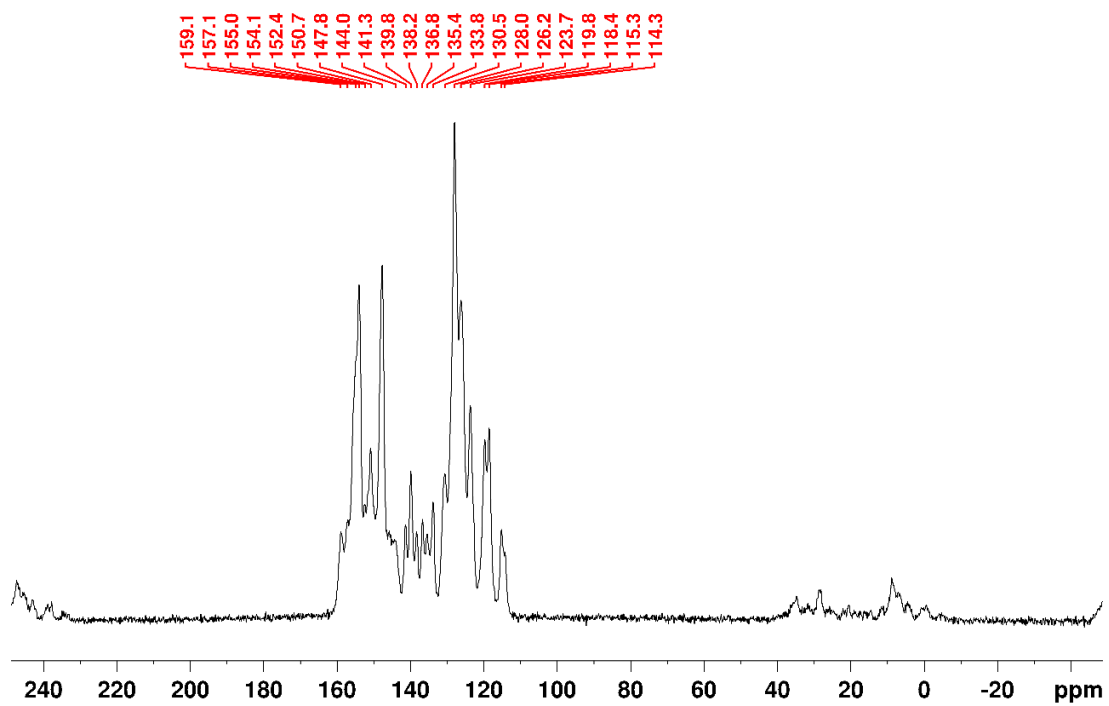

Fig. S13 Solid-state  $^{13}\text{C}$  NMR spectrum of **3**.

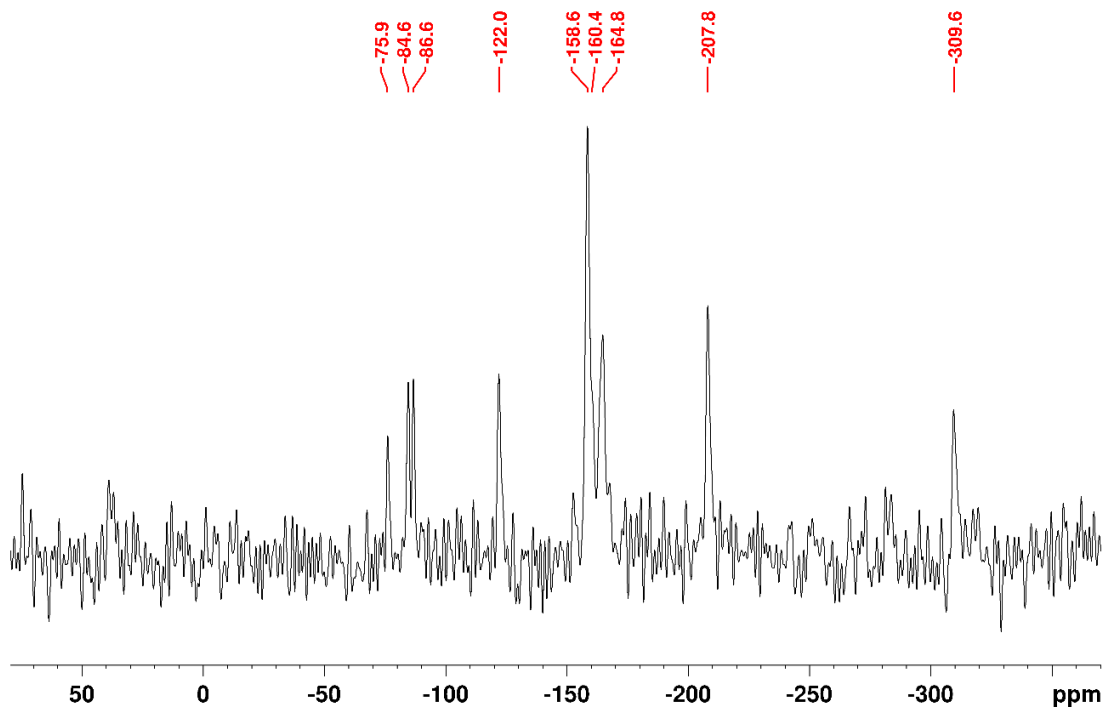

Fig. S14 Solid-state  $^{15}\text{N}$  NMR spectrum of 3.



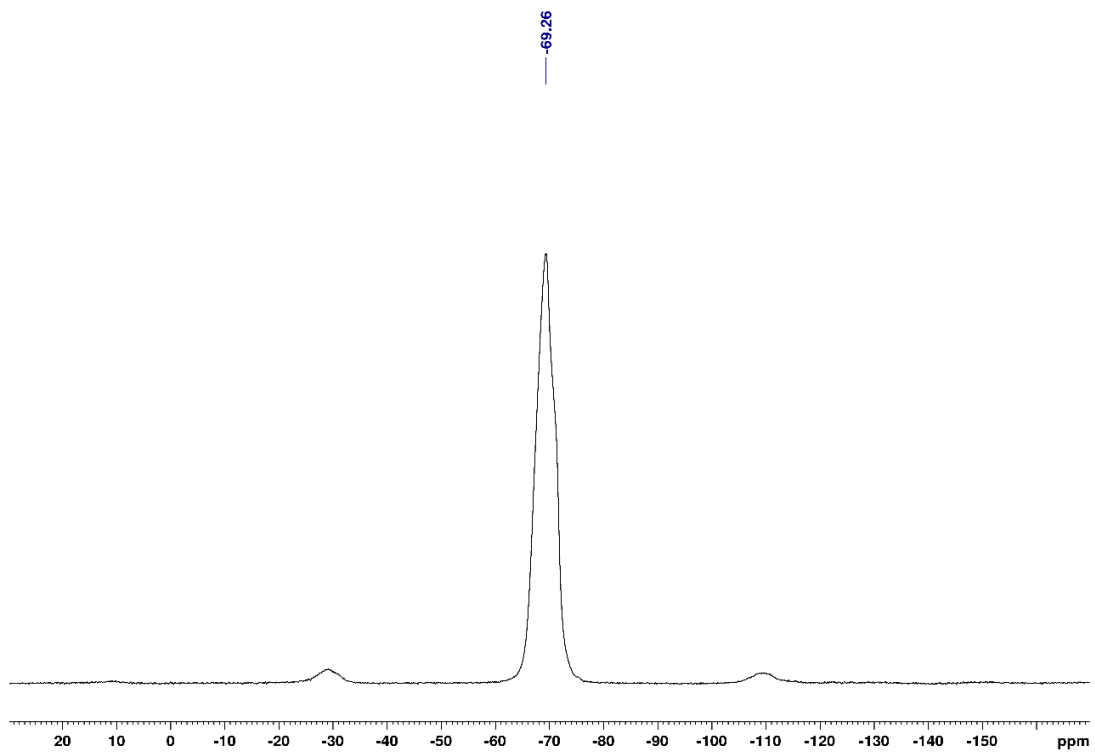

**Fig. S15** Solid-state  $^{19}\text{F}$  NMR spectrum of **3**.

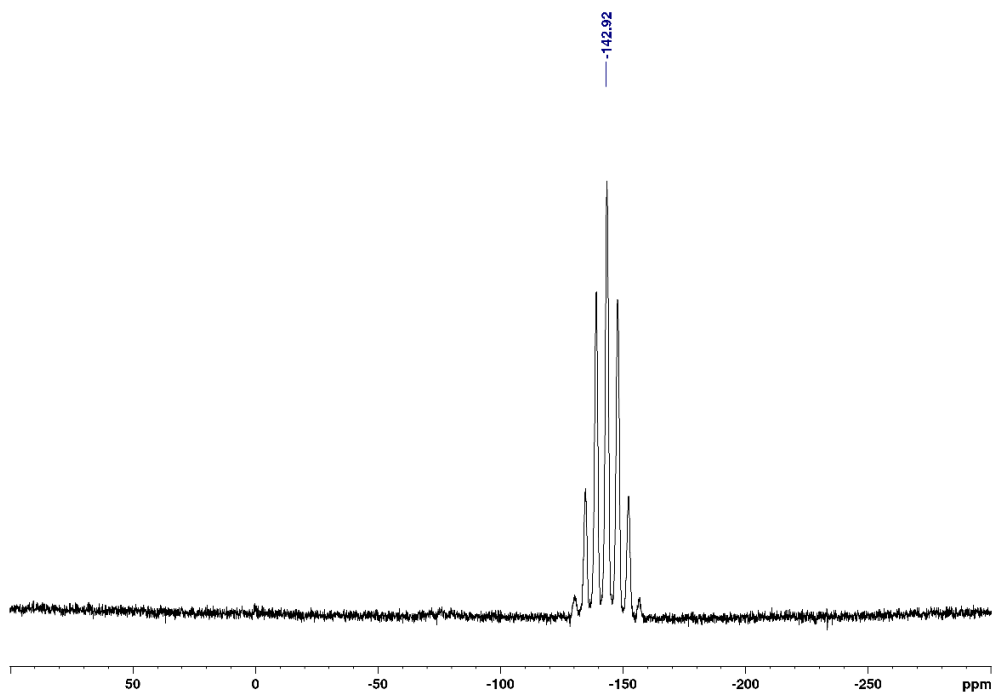

**Fig. S16** Solid-state  $^{31}\text{P}$  NMR spectrum of **3**.

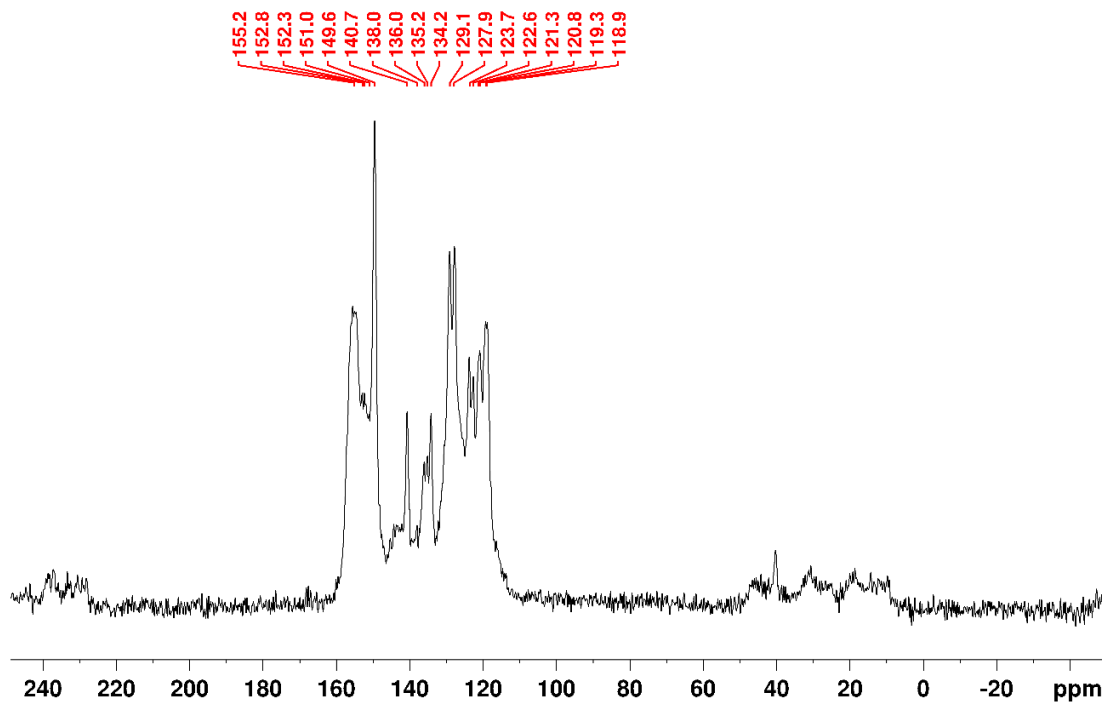

Fig. S17 Solid-state  $^{13}\text{C}$  NMR spectrum of **4**.

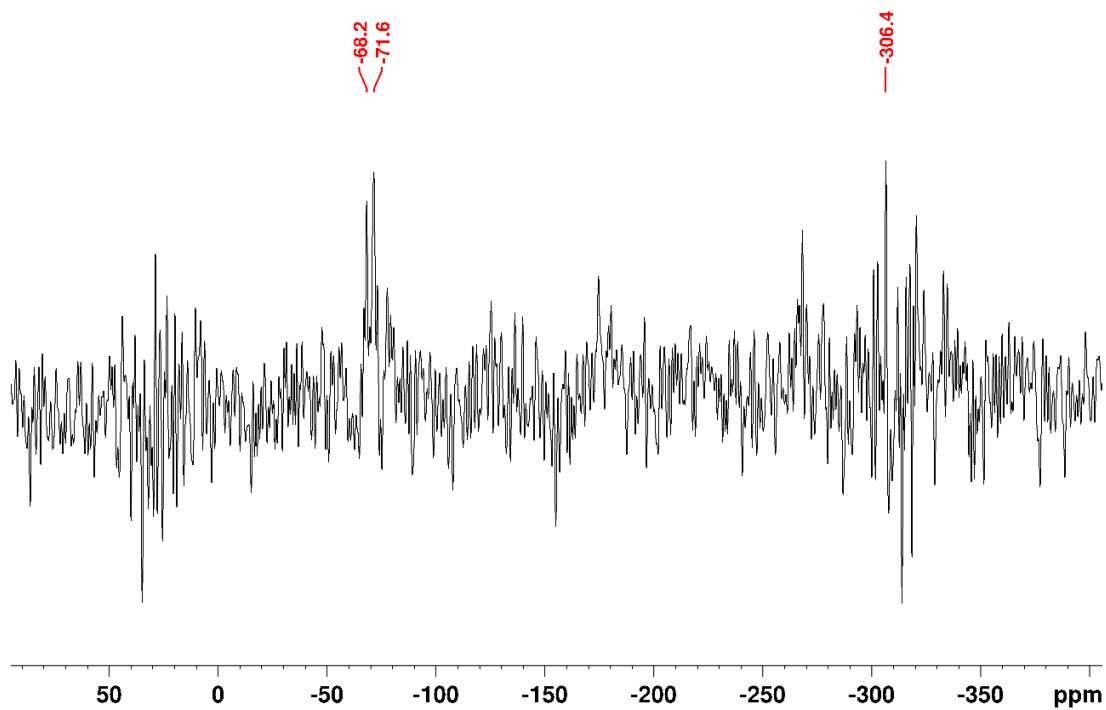

Fig. S18 Solid-state  $^{15}\text{N}$  NMR spectrum of 4.

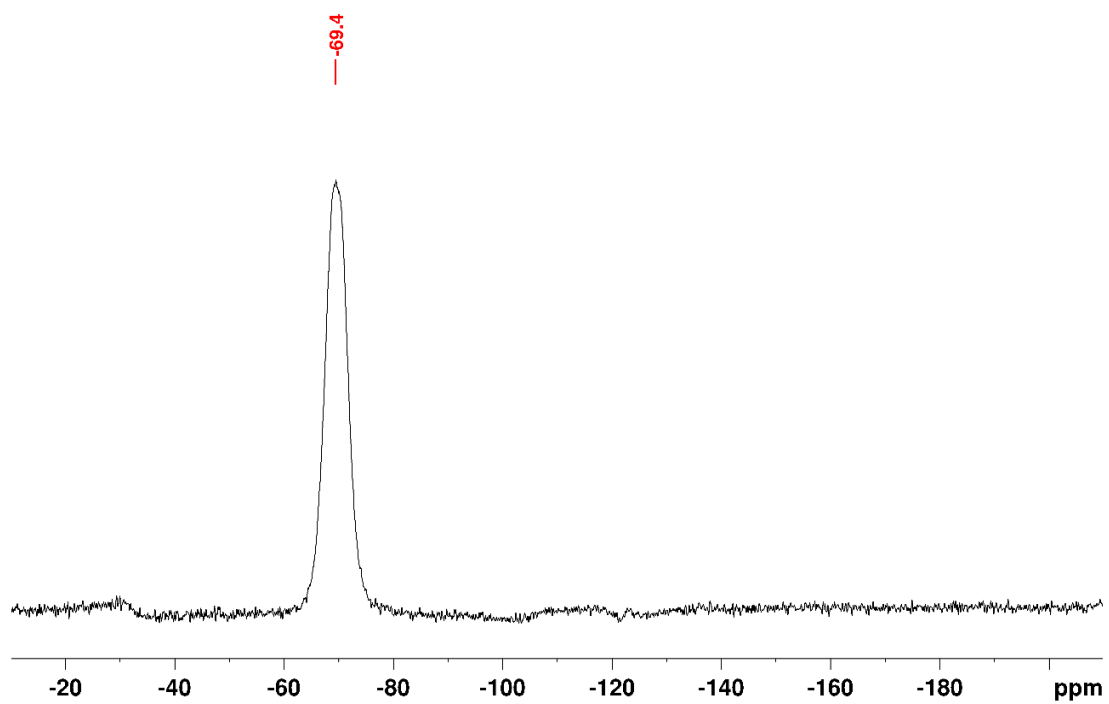

**Fig. S19** Solid-state  $^{19}\text{F}$  NMR spectrum of **4**.

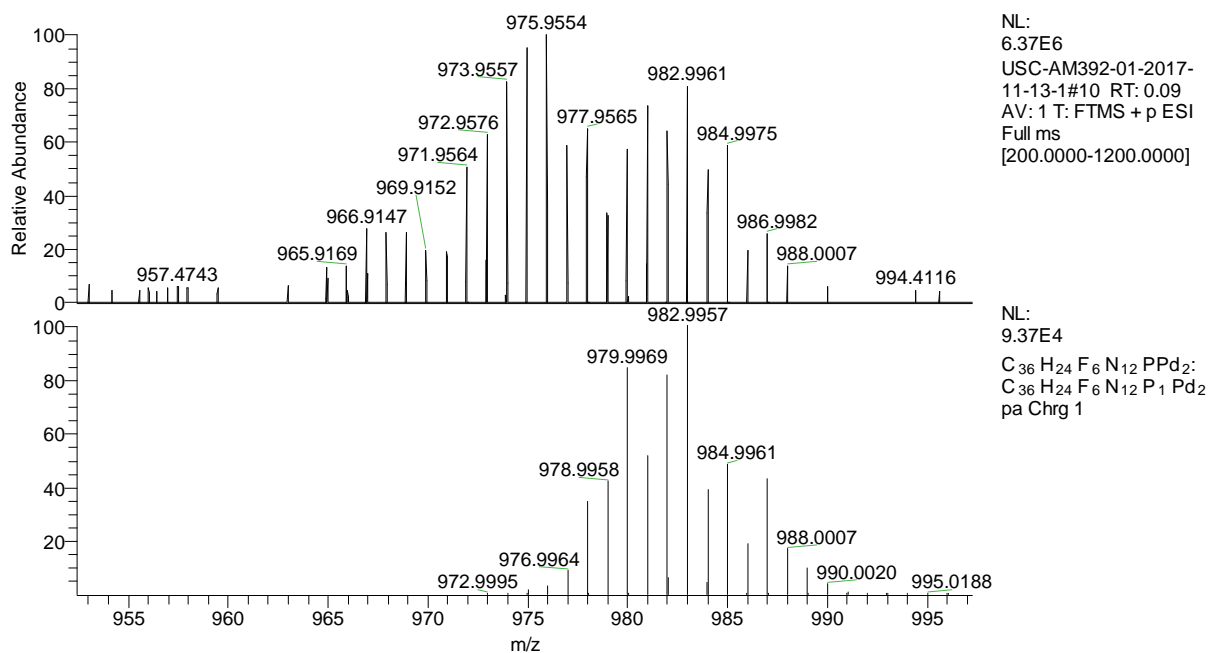

a)

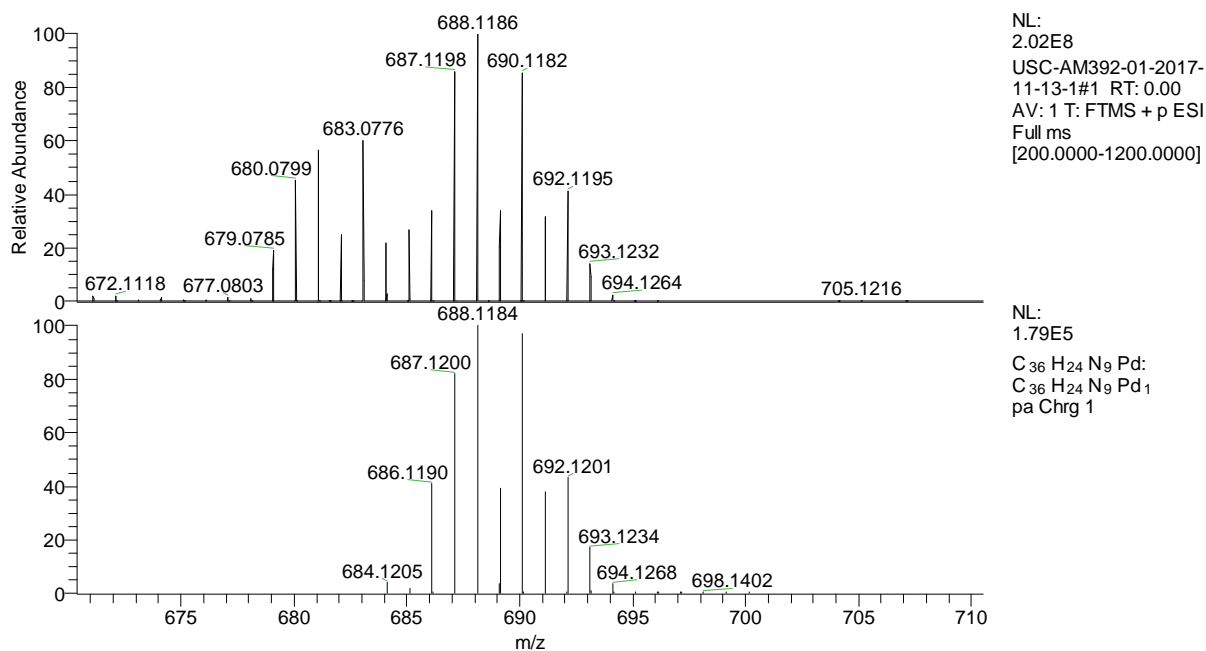

b)

**Fig. S20** ASAP mass spectra: Experimental (Up) and theoretical (down) ISOTOPIC pattern for complex **3** of **a)**  $m/z = 975.9554$  and **b)**  $m/z = 688.1186$ .

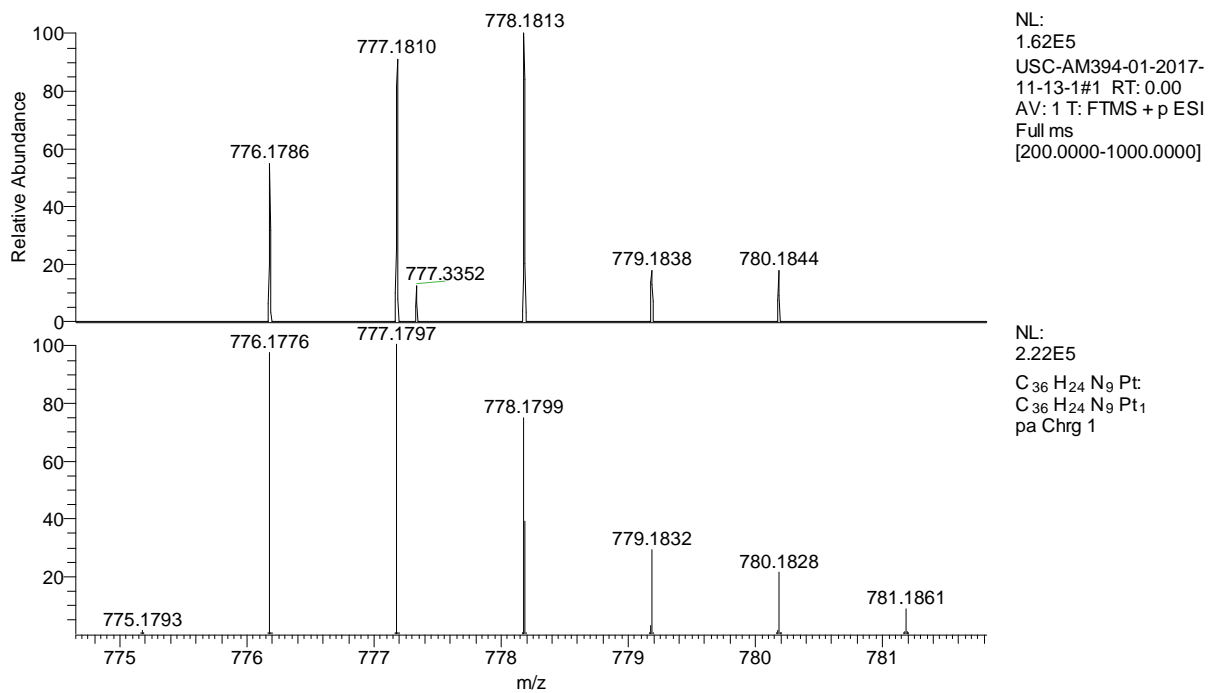

**Fig. S21** Electrospray ionization mass spectra: Experimental (Up) and theoretical (down) ISOTOPIC pattern for **4**.

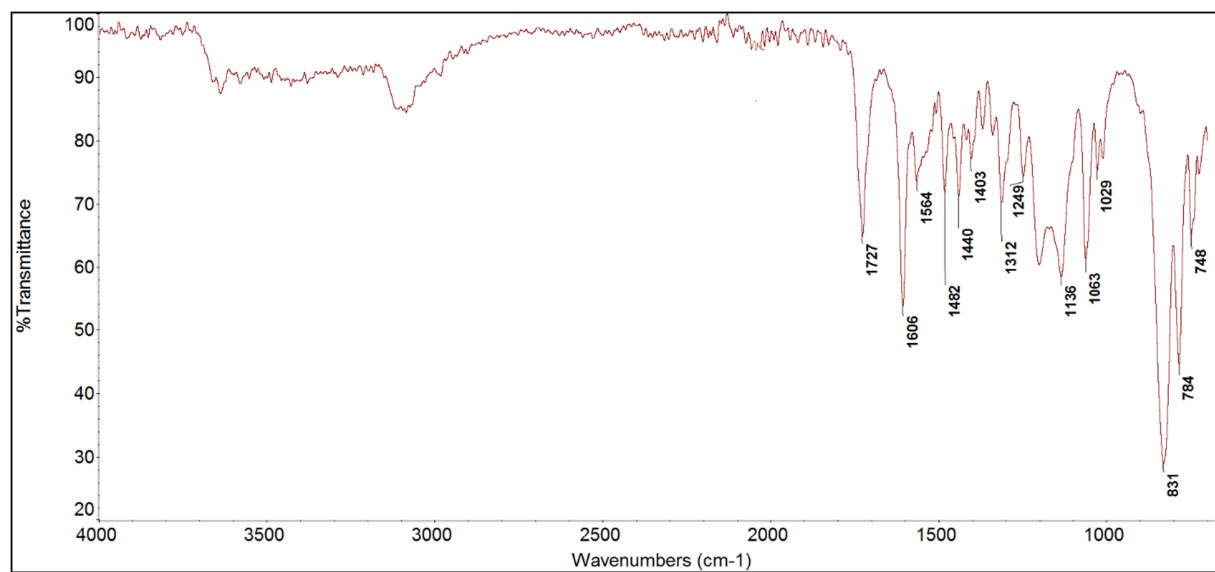

**Fig. S22** ATR IR spectrum of **5**.



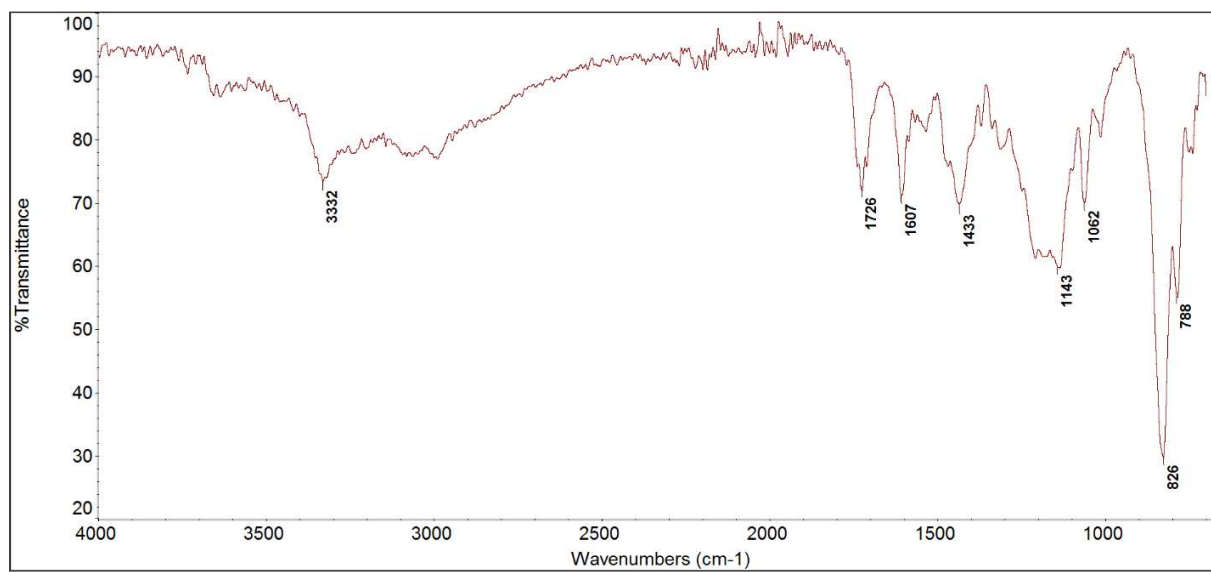

**Fig. S23** ATR IR spectrum of **6**.

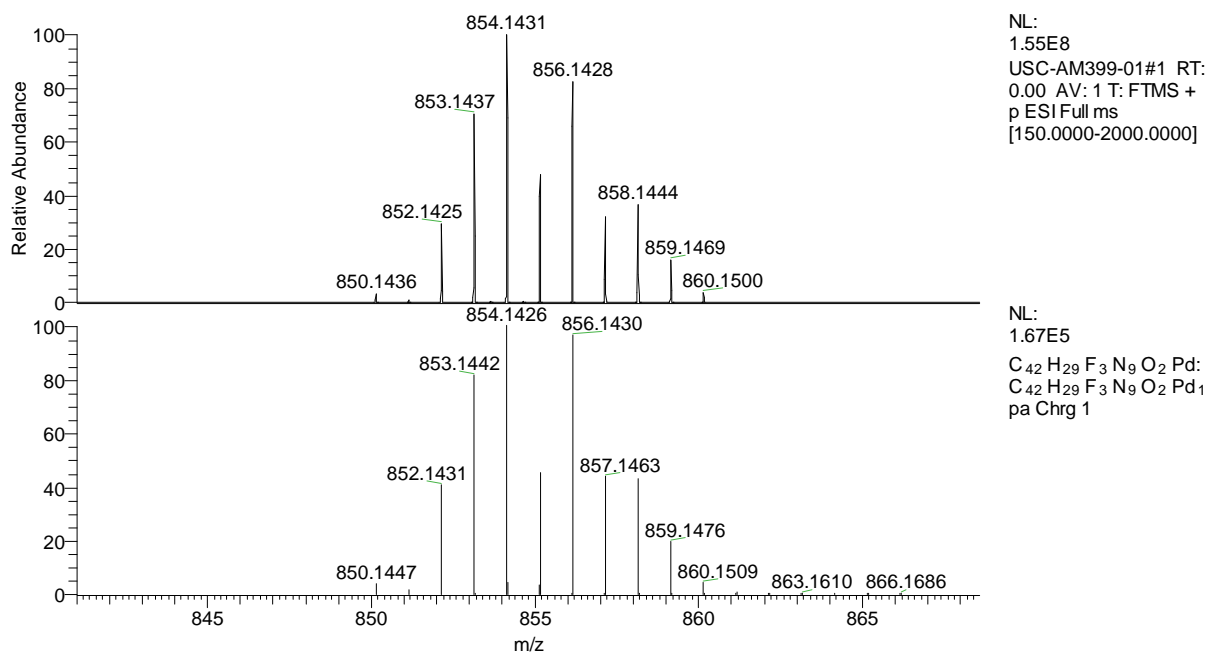

a)

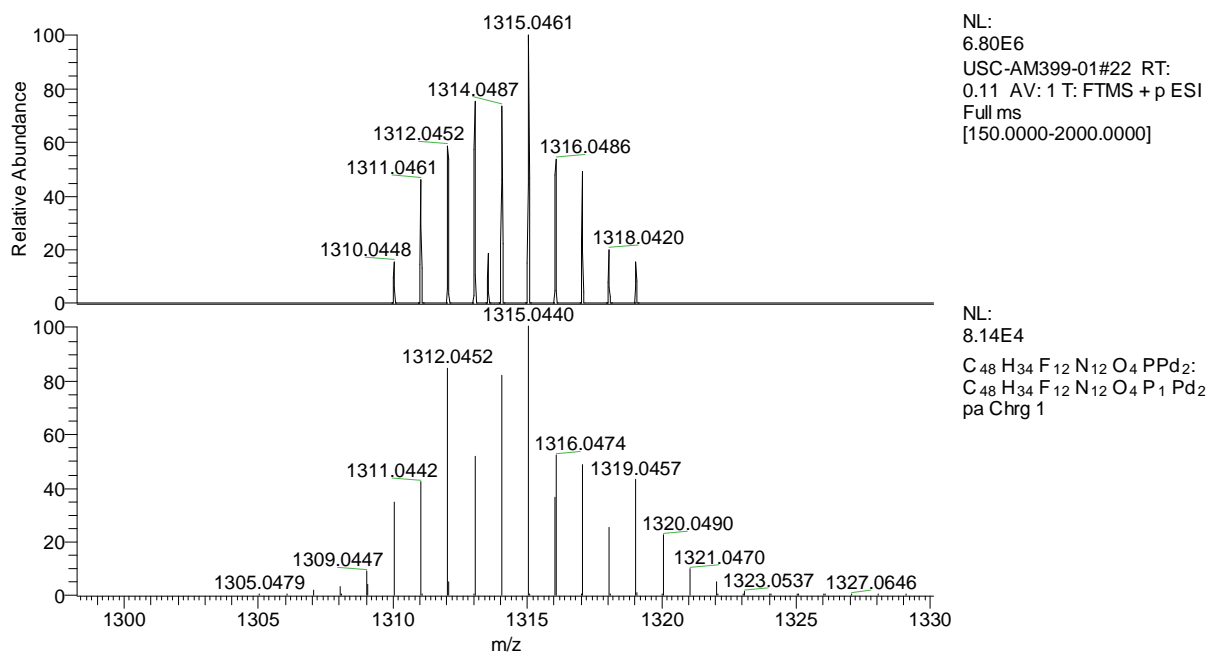

b)

**Fig. S24** Electrospray ionization mass spectra: Experimental (Up) and theoretical (down) ISOTOPIC pattern for complex **5** of **a)**  $m/z = 854.1431$  and **b)**  $m/z = 1315.0461$ .

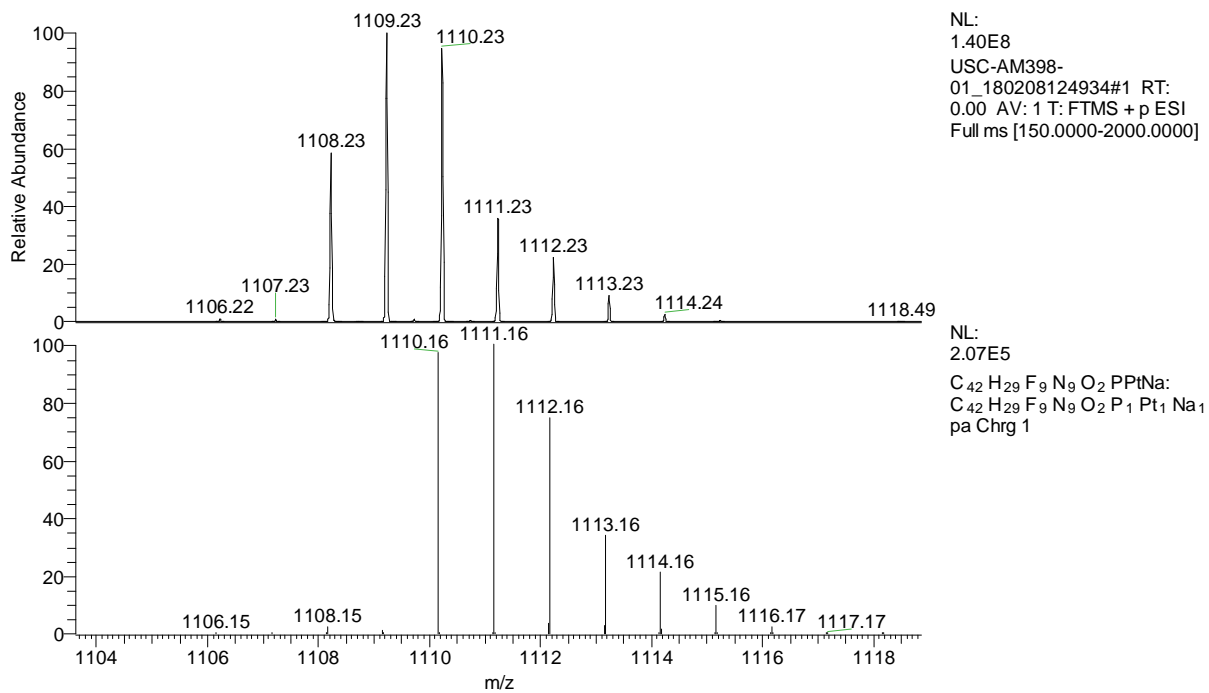

**Fig. S25** Electrospray ionization mass spectra: Experimental (Up) and theoretical (down) ISOTOPIC pattern for complex **6**.

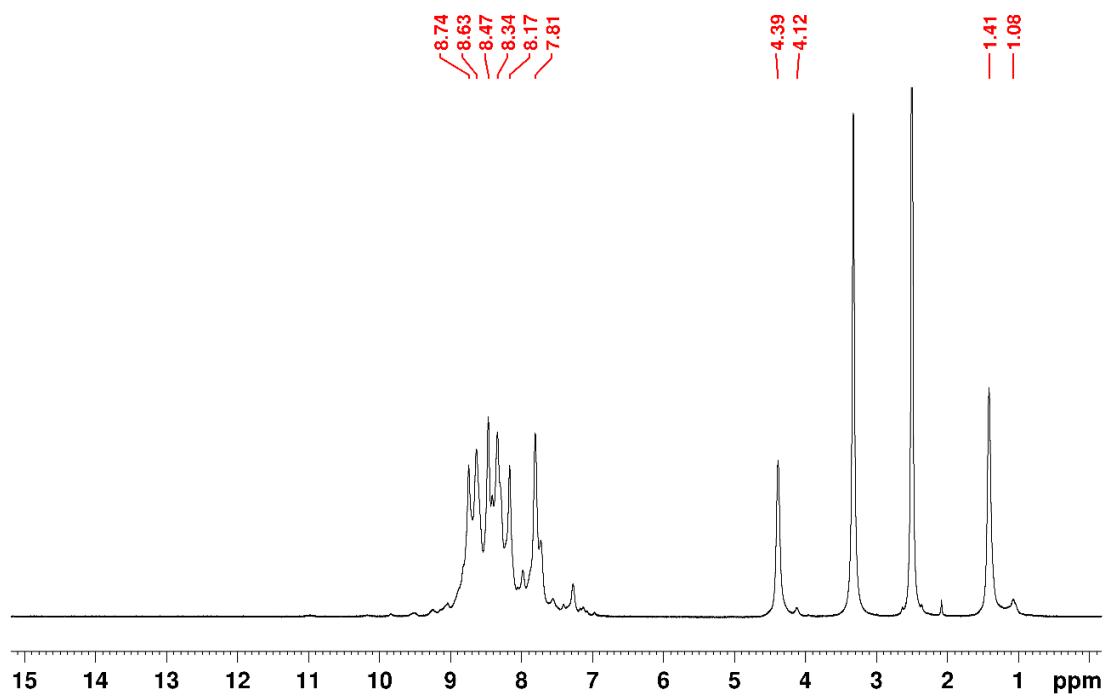

Fig. S26  $^1\text{H}$  NMR spectrum of 5.

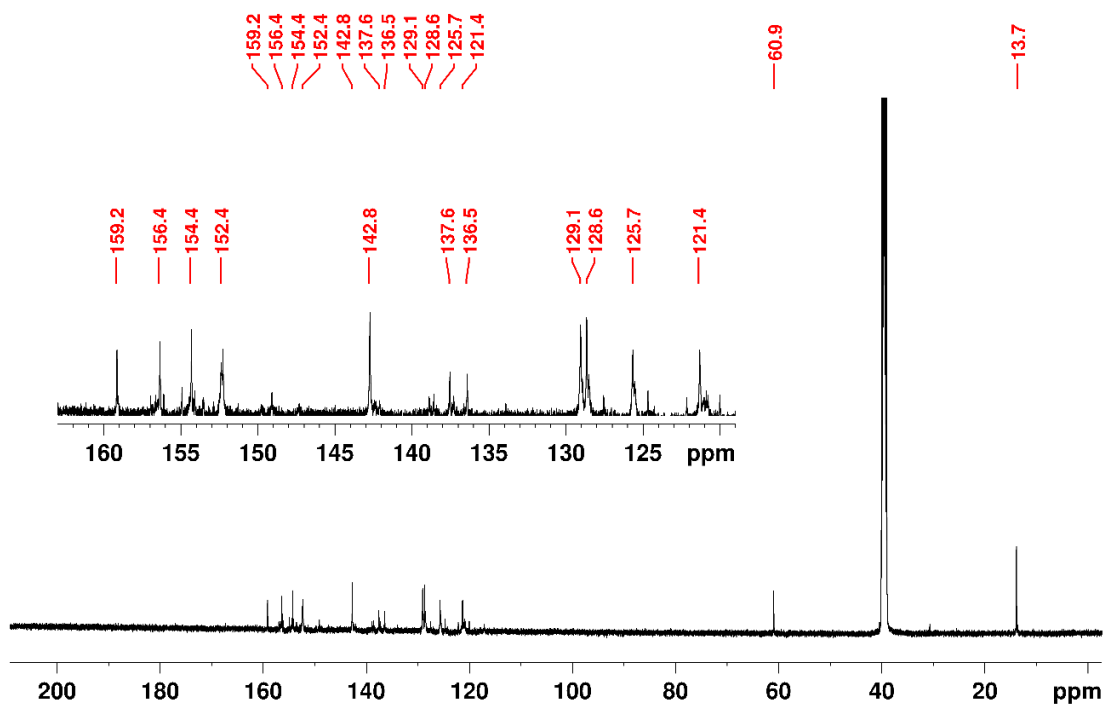

Fig. S27  $^{13}\text{C}$  NMR spectrum of 5.

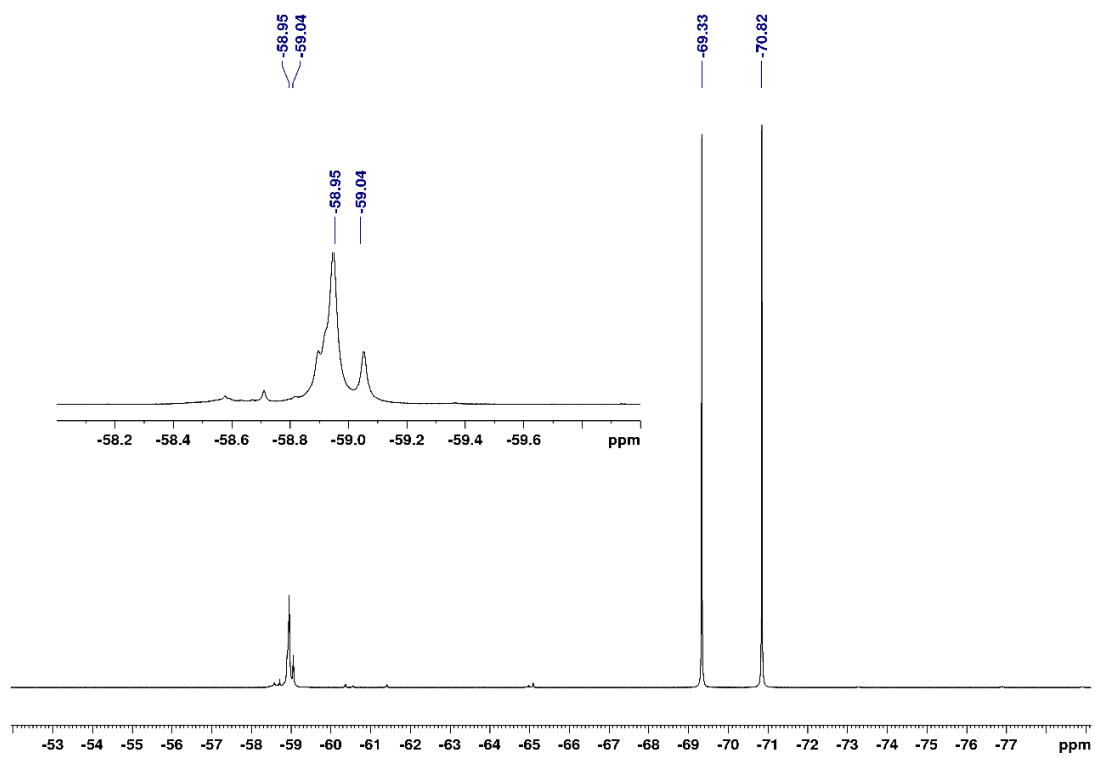

Fig. S28  $^{19}\text{F}$  NMR spectrum of 5.

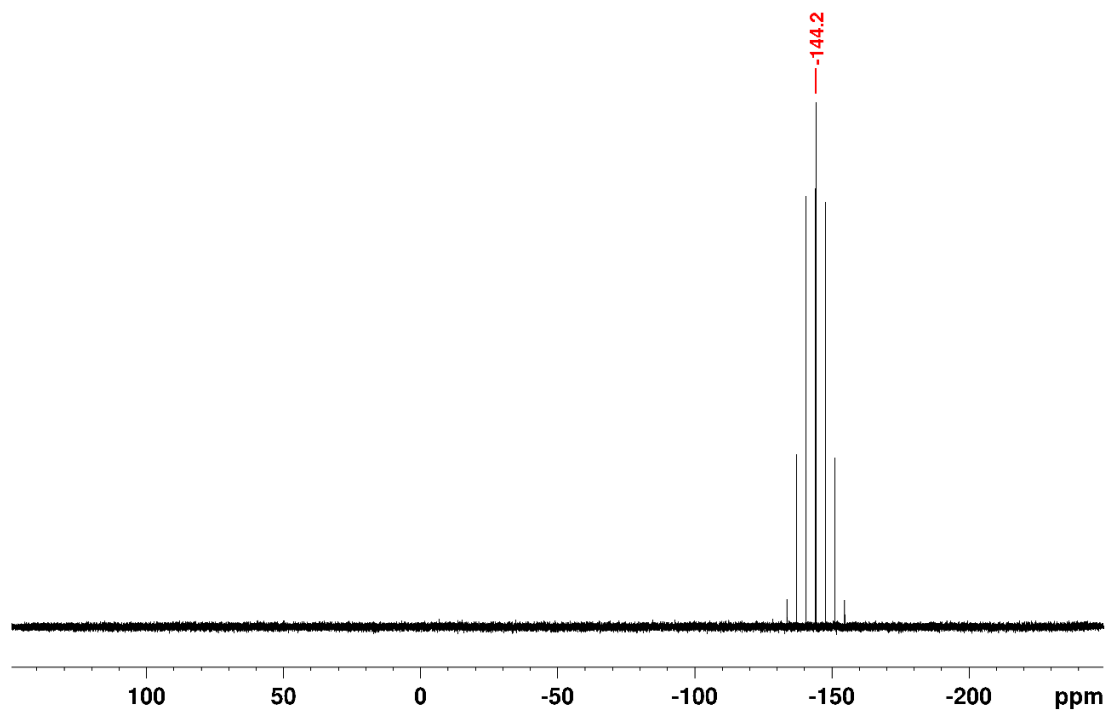

Fig. S29  $^{31}\text{P}$  NMR spectrum of 5.

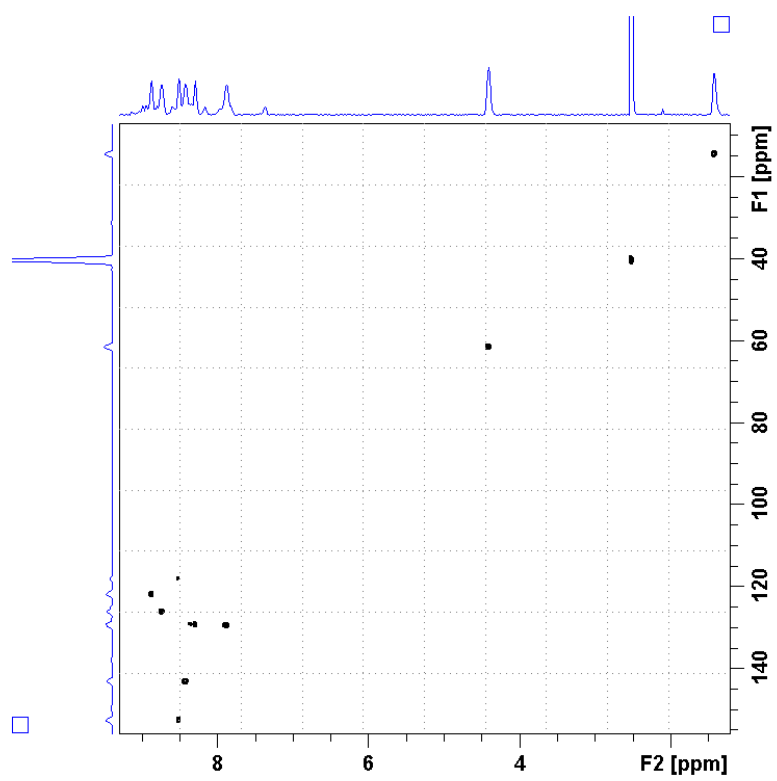

Fig. S30 HSQC  $\{^1\text{H}, ^{13}\text{C}\}$  NMR spectrum of 5.



**Table S1** Corrected energies values of Pd(II) and Pt(II) triazolate bound isomers (**5** and **6**).

|                                     | N1           | N2           | N3           |
|-------------------------------------|--------------|--------------|--------------|
| <b>• 5</b>                          |              |              |              |
| Electronic Energy (EE)              | -2679.336996 | -2679.196433 | -2679.330052 |
| Zero-point Energy Correction        | 0.643316     | 0.638885     | 0.643157     |
| Thermal Correction to Energy        | 0.690310     | 0.679139     | 0.690140     |
| Thermal Correction to Enthalpy      | 0.691254     | 0.680083     | 0.691084     |
| Thermal Correction to Free Energy   | 0.553438     | 0.563539     | 0.553476     |
| EE + Zero-point Energy              | -2678.693680 | -2678.557548 | -2678.686896 |
| EE + Thermal Energy Correction      | -2678.646686 | -2678.517294 | -2678.639913 |
| EE + Thermal Enthalpy Correction    | -2678.645742 | -2678.516350 | -2678.638969 |
| EE + Thermal Free Energy Correction | -2678.783558 | -2678.632894 | -2678.776576 |
| Imaginary frequencies               | 0            | 10           | 0            |
| <b>• 6</b>                          |              |              |              |
| Electronic Energy (EE)              | -3659.266939 | -3659.272574 | -3659.241110 |
| Zero-point Energy Correction        | 0.769904     | 0.771597     | 0.769330     |
| Thermal Correction to Energy        | 0.832047     | 0.833372     | 0.831495     |
| Thermal Correction to Enthalpy      | 0.832992     | 0.834316     | 0.832439     |
| Thermal Correction to Free Energy   | 0.661075     | 0.663870     | 0.660585     |
| EE + Zero-point Energy              | -3658.497035 | -3658.500978 | -3658.471780 |
| EE + Thermal Energy Correction      | -3658.434891 | -3658.439203 | -3658.409615 |
| EE + Thermal Enthalpy Correction    | -3658.433947 | -3658.438258 | -3658.408671 |
| EE + Thermal Free Energy Correction | -3658.605864 | -3658.608705 | -3658.580525 |
| Imaginary frequencies               | 0            | 0            | 0            |

**Table S2** calculated bond lengths of the Pd(II) triazolate isomers (N1, N2 and N3).

| 5                   |                     |                     |
|---------------------|---------------------|---------------------|
| N1                  | N2                  | N3                  |
| Pd-N34 = 1.97462    | Pd-N34 = 1.98458    | Pd-N34 = 1.97570    |
| Pd-N35 = 2.06841    | Pd-N35 = 2.09047    | Pd-N35 = 2.07218    |
| Pd-N36 = 2.07493    | Pd-N36 = 2.09454    | Pd-N36 = 2.07551    |
| Pd-N69 = 2.02709    | Pd-N69 = 2.02863    | Pd-N69 = 2.03211    |
| Pd-N63 = 2.07532    | Pd-N63 = 2.09568    | Pd-N63 = 2.06878    |
| Pd-N64 = 1.97436    | Pd-N64 = 1.98393    | Pd-N64 = 1.97459    |
| Pd-N65 = 2.06805    | Pd-N65 = 2.08859    | Pd-N65 = 2.07743    |
| Pd-N71 = 2.02641    | Pd-N72 = 2.03216    | Pd-N71 = 2.03473    |
| N69-N73 = 1.37872   | N69-N75 = 1.35856   | N69-N73 = 1.38611   |
| N73-N77 = 1.35490   | N69-N76 = 1.35956   | N73-N77 = 1.34699   |
| C20...N73 = 3.23423 | C20...N75 = 2.94835 | C20...N73 = 3.15394 |
| N34-Pd-N35 = 80.4   | N34-Pd-N35 = 79.9   | N34-Pd-N35 = 80.3   |
| N34-Pd-N36 = 80.2   | N34-Pd-N36 = 79.8   | N34-Pd-N36 = 80.3   |
| N34-Pd-N69 = 177.6  | N34-Pd-N69 = 179.8  | N34-Pd-N69 = 177.0  |
| N35-Pd-N36 = 160.2  | N35-Pd-N36 = 159.6  | N35-Pd-N36 = 160.3  |
| N35-Pd-N69 = 98.2   | N35-Pd-N69 = 100.0  | N35-Pd-N69 = 98.3   |
| N36-Pd-N69 = 101.2  | N36-Pd-N69 = 100.3  | N36-Pd-N69 = 101.1  |
| N63-Pd-N64 = 80.2   | N63-Pd-N64 = 79.8   | N63-Pd-N64 = 80.4   |
| N64-Pd-N65 = 80.4   | N64-Pd-N65 = 79.9   | N64-Pd-N65 = 80.3   |
| N64-Pd-N71 = 177.4  | N64-Pd-N71 = 179.8  | N64-Pd-N71 = 176.2  |
| N63-Pd-N65 = 160.2  | N63-Pd-N65 = 159.6  | N63-Pd-N65 = 160.3  |
| N63-Pd-N71 = 101.2  | N63-Pd-N72 = 100.2  | N63-Pd-N71 = 98.7   |
| N65-Pd-N71 = 98.3   | N65-Pd-N72 = 100.1  | N65-Pd-N71 = 100.8  |

For numbering, please see the figures [below](#).

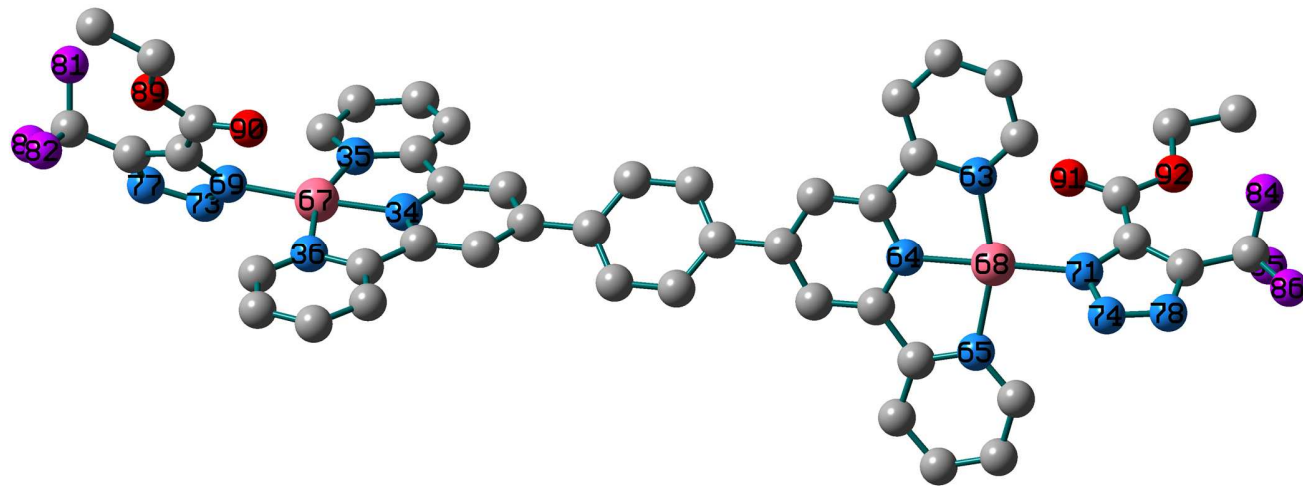

**N1-isomer**

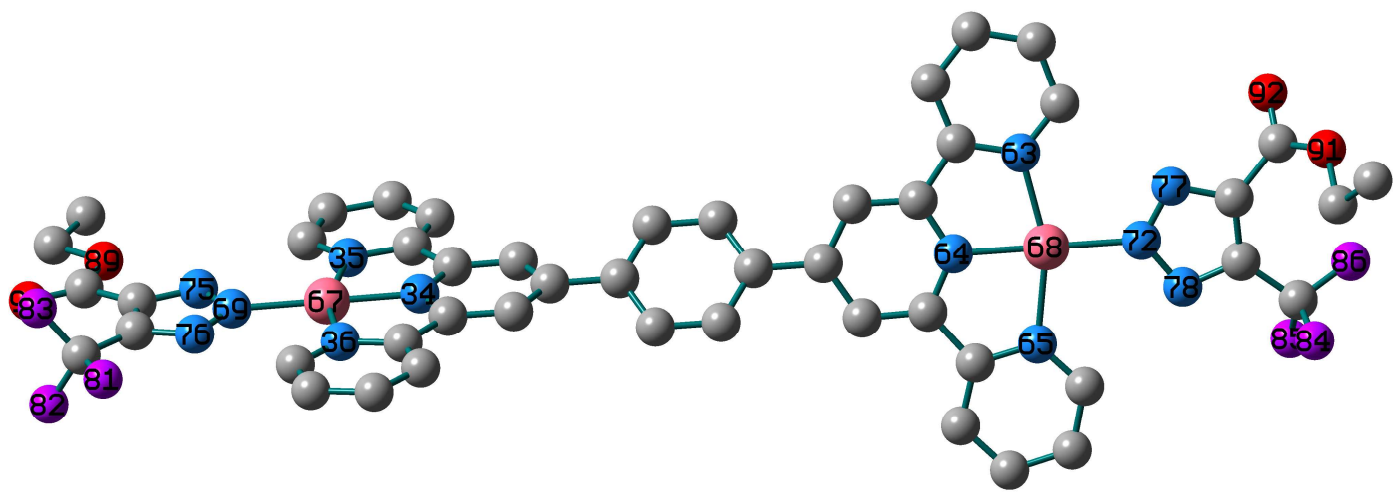

**N2-isomer**

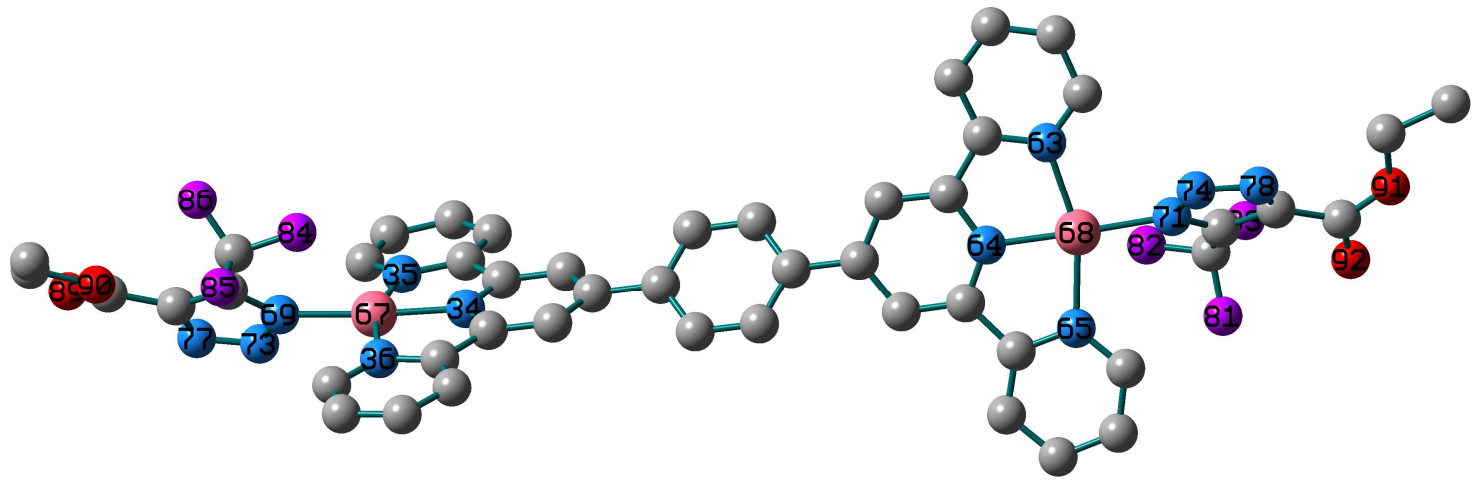

N3-isomer

**Table S3** calculated bond lengths of the Pt(II) triazolate isomers (N1, N2 and N3).

| 6                   |                     |                     |
|---------------------|---------------------|---------------------|
| N1                  | N2                  | N3                  |
| Pt–N34 = 1.96947    | Pt–N34 = 1.97758    | Pt–N34 = 1.96990    |
| Pt–N35 = 2.05598    | Pt–N35 = 2.07729    | Pt–N35 = 2.05829    |
| Pt–N36 = 2.05472    | Pt–N36 = 2.07918    | Pt–N36 = 2.05763    |
| Pt–N67 = 2.03856    | Pt–N67 = 2.03320    | Pt–N67 = 2.04240    |
| N67–N69 = 1.38645   | N67–N70 = 1.36070   | N67–N69 = 1.39375   |
| N69–N71 = 1.35034   | N67–N71 = 1.36270   | N69–N71 = 1.34447   |
| C20...N69 = 3.19623 | C20...N70 = 2.94163 | C20...N69 = 3.30979 |
| N34–Pt–N35 = 80.6   | N34–Pt–N35 = 80.0   | N34–Pt–N35 = 80.5   |
| N34–Pt–N36 = 80.4   | N34–Pt–N36 = 80.0   | N34–Pt–N36 = 80.5   |
| N35–Pt–N67 = 98.0   | N35–Pt–N67 = 99.8   | N35–Pt–N67 = 98.4   |
| N36–Pt–N67 = 101.0  | N36–Pt–N67 = 100.1  | N36–Pt–N67 = 100.7  |
| N34–Pt–N67 = 177.6  | N34–Pt–N67 = 179.8  | N34–Pt–N67 = 176.8  |
| N35–Pt–N36 = 160.8  | N35–Pt–N36 = 160.0  | N35–Pt–N36 = 160.7  |

For numbering, please see the figures [below](#).

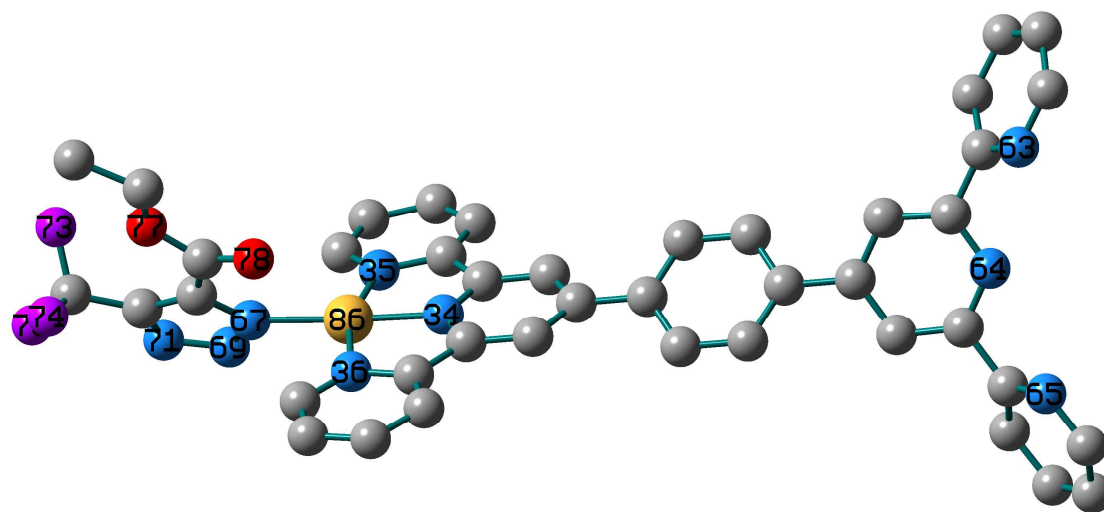

**N1-isomer**

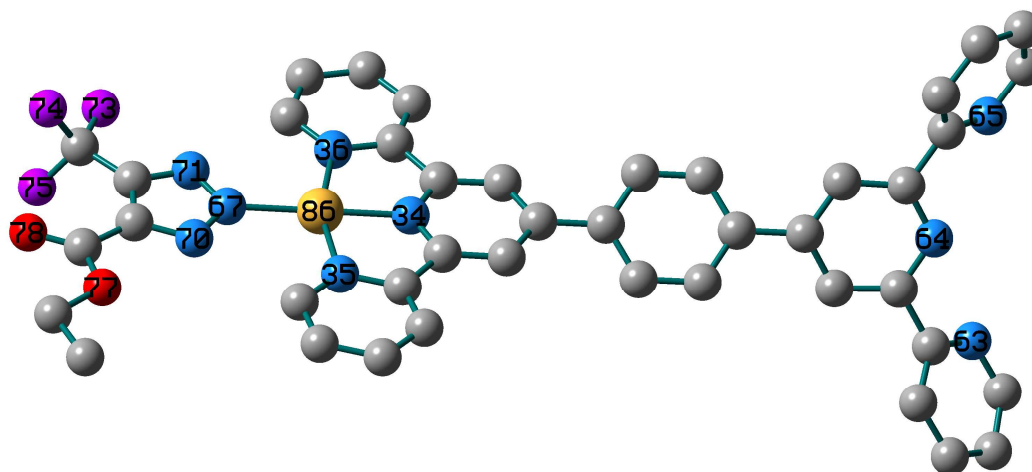

**N2-isomer**

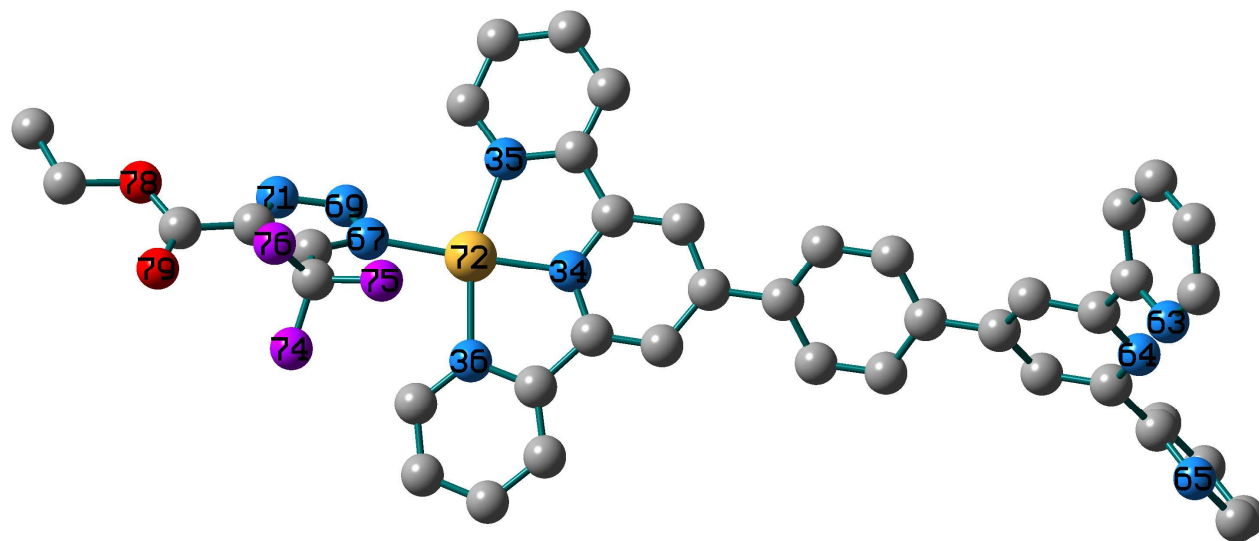

N3-isomer

**Table S4:** The electronic configuration of the metal center (Pd or Pt) of the triazolate isomers (N1, N2 and N3), its 4d (or 5d) electronic distribution and the natural atomic charge

|     | Occupancies of 4d or 5d orbitals |          |          |               |           | natural charge of metal center | electronic arrangement of metal center (Pd or Pt)                               |
|-----|----------------------------------|----------|----------|---------------|-----------|--------------------------------|---------------------------------------------------------------------------------|
|     | $d_{xy}$                         | $d_{xz}$ | $d_{yz}$ | $d_{x^2-y^2}$ | $d_{z^2}$ |                                |                                                                                 |
| • 5 |                                  |          |          |               |           |                                |                                                                                 |
| N1  | 1.94494                          | 1.95223  | 1.90568  | 1.64607       | 1.34579   | 0.68498                        | [Kr]5s <sup>0.31</sup> 4d <sup>8.79</sup> 5p <sup>0.22</sup> 5d <sup>0.01</sup> |
|     | 1.96439                          | 1.93930  | 1.80233  | 1.18047       | 1.90757   | 0.68575                        | [Kr]5s <sup>0.31</sup> 4d <sup>8.79</sup> 5p <sup>0.22</sup> 5d <sup>0.01</sup> |
| N2  | 1.97206                          | 1.94229  | 1.85229  | 1.10805       | 1.92903   | 0.68069                        | [Kr]5s <sup>0.32</sup> 4d <sup>8.80</sup> 5p <sup>0.20</sup> 5d <sup>0.01</sup> |
|     | 1.95252                          | 1.96486  | 1.74671  | 1.47997       | 1.65949   | 0.68299                        | [Kr]5s <sup>0.32</sup> 4d <sup>8.80</sup> 5p <sup>0.20</sup> 5d <sup>0.01</sup> |
| N3  | 1.93959                          | 1.94465  | 1.79695  | 1.20524       | 1.90079   | 0.69165                        | [Kr]5s <sup>0.30</sup> 4d <sup>8.79</sup> 5p <sup>0.22</sup> 5d <sup>0.01</sup> |
|     | 1.95916                          | 1.95146  | 1.73449  | 1.39017       | 1.75174   | 0.69155                        | [Kr]5s <sup>0.30</sup> 4d <sup>8.79</sup> 5p <sup>0.22</sup> 5d <sup>0.01</sup> |
| • 6 |                                  |          |          |               |           |                                |                                                                                 |
| N1  | 1.91865                          | 1.93822  | 1.66505  | 1.41819       | 1.65163   | 0.71638                        | [Xe]6s <sup>0.47</sup> 5d <sup>8.59</sup> 6p <sup>0.22</sup> 6d <sup>0.02</sup> |
| N2  | 1.94685                          | 1.89800  | 1.80598  | 1.05430       | 1.88533   | 0.73683                        | [Xe]6s <sup>0.47</sup> 5d <sup>8.59</sup> 6p <sup>0.20</sup> 6d <sup>0.01</sup> |
| N3  | 1.93263                          | 1.92642  | 1.68693  | 1.21879       | 1.83169   | 0.70854                        | [Xe]6s <sup>0.47</sup> 5d <sup>8.60</sup> 6p <sup>0.22</sup> 6d <sup>0.02</sup> |



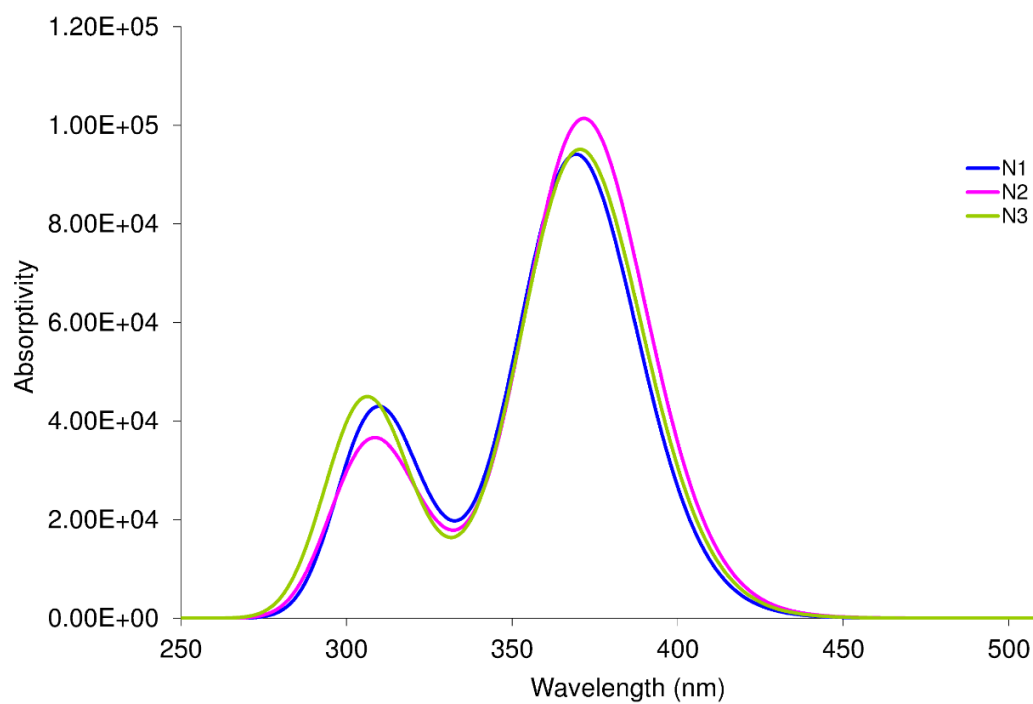

**Fig. S31** TDDFT spectrum of the triazolite isomers of **5** calculated at B3LYP/LANL2DZ level of theory using PCM solvation model.

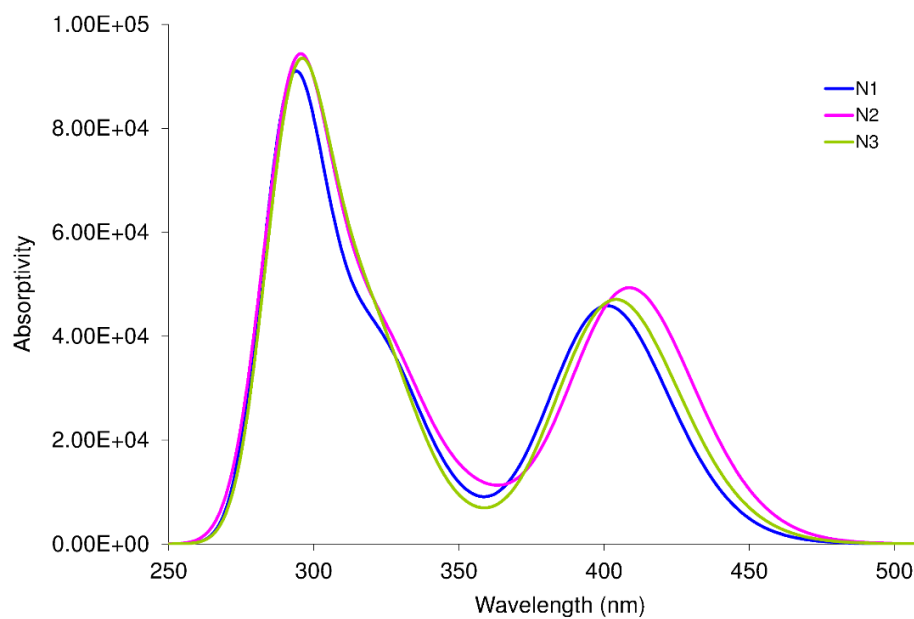

**Fig. S32** TDDFT spectrum of the triazolite isomers of **6** calculated at B3LYP/LANL2DZ level of theory using PCM solvation model.

| <b>Table S5</b> Computed excitation energies (eV), electronic transition configurations and oscillator strengths ( $f$ ) of rhenium(I) compounds (selected, $f > 0.001$ ) (Selected) |                 |        |                                          |
|--------------------------------------------------------------------------------------------------------------------------------------------------------------------------------------|-----------------|--------|------------------------------------------|
| Energy (cm <sup>-1</sup> )                                                                                                                                                           | Wavelength (nm) | $f$    | Major contributions                      |
| ● Pd(II) triazolate isomers                                                                                                                                                          |                 |        |                                          |
| ✓ <b>N1</b>                                                                                                                                                                          |                 |        |                                          |
| 27040                                                                                                                                                                                | 369             | 1.2152 | HOMO→LUMO (94%)                          |
| 32137                                                                                                                                                                                | 311             | 0.1118 | HOMO-3→LUMO (23%)                        |
| 32656                                                                                                                                                                                | 306             | 0.1615 | HOMO-4→LUMO+1 (58%)                      |
| ✓ <b>N2</b>                                                                                                                                                                          |                 |        |                                          |
| 26835                                                                                                                                                                                | 372             | 1.2845 | HOMO→LUMO (92%)                          |
| 28163                                                                                                                                                                                | 355             | 0.0816 | HOMO-2→LUMO (68%)                        |
| 31914                                                                                                                                                                                | 313             | 0.0342 | HOMO-1→LUMO (29%), HOMO-1→LUMO+1 (37%)   |
| 32327                                                                                                                                                                                | 309             | 0.1331 | HOMO-8→LUMO (37%), HOMO-1→LUMO+1 (32%)   |
| ✓ <b>N3</b>                                                                                                                                                                          |                 |        |                                          |
| 26991                                                                                                                                                                                | 370             | 1.0199 | HOMO→LUMO (74%)                          |
| 28223                                                                                                                                                                                | 354             | 0.0645 | HOMO-3→LUMO (40%)                        |
| 32690                                                                                                                                                                                | 305             | 0.2082 | HOMO-9→LUMO (21%), HOMO-3→LUMO+1 (33%)   |
| ● Pt(II) triazolate isomers                                                                                                                                                          |                 |        |                                          |
| ✓ <b>N1</b>                                                                                                                                                                          |                 |        |                                          |
| 24954                                                                                                                                                                                | 400             | 0.6288 | HOMO→LUMO (93%)                          |
| 28638                                                                                                                                                                                | 349             | 0.0272 | HOMO-9→LUMO (36%), HOMO-4→LUMO (39%)     |
| 30813                                                                                                                                                                                | 324             | 0.2778 | HOMO-10→LUMO (78%)                       |
| 32694                                                                                                                                                                                | 305             | 0.0663 | HOMO-9→L+1 (49%), HOMO-4→LUMO+1 (22%)    |
| 34117                                                                                                                                                                                | 293             | 0.8383 | HOMO→LUMO+3 (69%)                        |
| ✓ <b>N2</b>                                                                                                                                                                          |                 |        |                                          |
| 24479                                                                                                                                                                                | 408             | 0.673  | HOMO→LUMO (92%)                          |
| 27990                                                                                                                                                                                | 357             | 0.0905 | HOMO-7→LUMO (57%)                        |
| 30378                                                                                                                                                                                | 329             | 0.0626 | HOMO-9→LUMO (72%)                        |
| 30617                                                                                                                                                                                | 326             | 0.2639 | HOMO-10→LUMO (70%),                      |
| 31576                                                                                                                                                                                | 316             | 0.1009 | HOMO-8→LUMO (49%), HOMO-4→LUMO+7 (23%)   |
| 31900                                                                                                                                                                                | 313             | 0.0541 | HOMO-7→LUMO+1 (61%)                      |
| 32522                                                                                                                                                                                | 307             | 0.1003 | HOMO-6→LUMO+1 (47%), HOMO-4→LUMO+7 (35%) |
| 33897                                                                                                                                                                                | 295             | 0.6919 | HOMO→LUMO+2 (52%)                        |
| ✓ <b>N3</b>                                                                                                                                                                          |                 |        |                                          |

|       |     |        |                                        |
|-------|-----|--------|----------------------------------------|
| 24795 | 403 | 0.6226 | HOMO→LUMO (88%)                        |
| 25860 | 386 | 0.0014 | HOMO-6→LUMO (92%)                      |
| 26776 | 373 | 0.0048 | HOMO-1→LUMO (98%)                      |
| 28385 | 352 | 0.0076 | HOMO-9→LUMO (22%), HOMO-3→LUMO (60%)   |
| 28753 | 347 | 0.022  | HOMO-9→LUMO (22%), HOMO-4→LUMO+1 (30%) |
| 29311 | 341 | 0.0135 | HOMO-5→LUMO (61%)                      |
| 30883 | 323 | 0.2503 | HOMO-10→LUMO (72%)                     |
| 33907 | 294 | 0.9382 | HOMO→LUMO+2 (84%)                      |
